1  
2  
3  
4  
5  
6  
7  
8  
9  
10  
11  
12  
13  
14  
15  
16  
17  
18  
19  
20

**Host metabolic reprogramming of *Pseudomonas aeruginosa*  
by phage-based quorum sensing modulation**

*Hendrix H.<sup>1</sup>, Kogadeeva M.<sup>2</sup>, Zimmermann M.<sup>2</sup>, Sauer U.<sup>2</sup>, De Smet J.<sup>1</sup>, Muchez L.<sup>3</sup>, Lissens M.<sup>1</sup>, Staes I.<sup>4</sup>, Voet M.<sup>1</sup>, Wagemans J.<sup>1</sup>, Ceysens P-J.<sup>1,5</sup>, Noben J-P.<sup>6</sup>, Aertsen A.<sup>4</sup>, Lavigne R.<sup>1</sup>*

<sup>1</sup> Laboratory of Gene Technology, Department of Biosystems, KU Leuven, Heverlee, Belgium

<sup>2</sup> Institute of Molecular Systems Biology, ETH Zurich, Zürich, Switzerland

<sup>3</sup> Centre for Surface Chemistry and Catalysis, Department of Microbial and Molecular Systems, KU Leuven, Heverlee, Belgium

<sup>4</sup> Laboratory of Food Microbiology, Department of Microbial and Molecular Systems, KU Leuven, Heverlee, Belgium

<sup>5</sup> Unit of Human Bacterial Diseases, Sciensano, Brussels, Belgium

<sup>6</sup> Biomedical Research Institute and Transnational University Limburg, School of Life Sciences, Hasselt University, Diepenbeek, Belgium

\* To whom correspondence should be addressed. Tel: (+32) 16 37 95 24; Fax: (+32) 16 32 19 65; E-mail: [rob.lavigne@kuleuven.be](mailto:rob.lavigne@kuleuven.be)

21 **Abstract**

22 The *Pseudomonas* quinolone signal (PQS) is a multifunctional quorum sensing molecule of key  
23 importance to the *P. aeruginosa* metabolism. We here describe that the lytic *Pseudomonas* bacterial  
24 virus LUZ19 targets this population-density-dependent signaling system by expressing quorum  
25 sensing-associated acyltransferase (Qst) during early infection. Qst interacts with a key biosynthesis  
26 pathway enzyme PqsD, resulting in decreased metabolites levels of PQS and its precursor 2-heptyl-  
27 4(1H)-quinolone. The lack of a functional PqsD enzyme impairs the normal LUZ19 infection but is  
28 restored by external supplementation of 2-heptyl-4(1H)-quinolone, showing that LUZ19 exploits PQS  
29 to successfully achieve its infection. A functional interaction network, which includes enzymes of the  
30 central carbon metabolism (CoaC/ThiD) and a novel non-ribosomal peptide synthetase pathway  
31 (PA1217), suggests a broader functional context for Qst, which blocks *P. aeruginosa* cell division. Qst  
32 represents an exquisite example of intricate reprogramming of the bacterium, which may be exploited  
33 towards antibiotic target discovery for this bacterial pathogen.

## 34 **Introduction**

35 Bacteriophages are the most abundant biological entities on Earth, affecting bacteria and even global  
36 ecosystems through microbial mortality (Suttle, 2007), horizontal gene transfer (McDaniel *et al.*, 2010)  
37 and metabolic reprogramming (De Smet *et al.*, 2016). Due to intimate co-evolution with bacteria,  
38 phages efficiently and extensively adapt the host physiology. This hijacking primarily takes place  
39 immediately after infection and is observed at all levels of the cellular metabolism (De Smet *et al.*,  
40 2017). At the molecular level, this hijacking is achieved through i.a. protein-protein interactions of  
41 mainly early phage proteins that inhibit, activate or functionally alter specific host proteins (Hauser *et*  
42 *al.*, 2012; Roucourt and Lavigne, 2009). These early proteins can also include metabolic enzymes, of  
43 which the genes are termed auxiliary metabolic genes (AMGs) (Thompson *et al.*, 2011). AMGs generally  
44 encode for proteins which complement rate-limiting enzymes to compensate for imbalances arising  
45 during infection, especially in nucleotide biosynthesis (Enav *et al.*, 2014; Miller *et al.*, 2003) and energy  
46 production (Sharon *et al.*, 2011; Sullivan *et al.*, 2006). However, emerging evidence supports a more  
47 general model of phage-directed host reprogramming in which AMGs influence nearly the entire  
48 central carbon metabolism (Hurwitz *et al.*, 2013; Thompson *et al.*, 2011).

49 This host takeover is not self-evident and is preceded by a struggle for cellular control between the  
50 phage and the host (Samson *et al.*, 2013). A recently identified strategy is the use of quorum sensing  
51 systems by *Pseudomonas aeruginosa* to activate its defense mechanisms against phage predation.  
52 Overall, the risk of phage infection is the highest at high cell density. Known phage resistance  
53 mechanisms regulated by quorum sensing are the reduction of phage receptors on the cell surface  
54 (Høyland-Kroghsbo *et al.*, 2013) and the activation of the prokaryotic adaptive CRISPR-Cas immune  
55 system (encoded by the **C**lustered **R**egularly **I**nterspaced **S**hort **P**alindromic **R**epeats loci and **C**RISPR-  
56 **a**ssociated (Cas) genes) (Patterson *et al.*, 2016; Høyland-Kroghsbo *et al.*, 2017). More generally,  
57 quorum sensing influences the cell's physiological state as to better protect it against phage attack  
58 (Qin *et al.*, 2017).

59 In *Pseudomonas aeruginosa*, four main quorum sensing systems have been identified to date: the N-  
60 acylhomoserine lactones (AHL)-dependent systems LasI/LasR and RhII/RhIR (Pesci *et al.*, 1997), the  
61 integrated Quorum sensing signal (IQS) system AmbBCDE/IqsR (Lee *et al.*, 2013) and the *Pseudomonas*  
62 quinolone signal (PQS) system PqsABCDH/PqsR (Dubern and Diggle, 2008). These signaling systems are  
63 believed to regulate the expression of up to 10% of *Pseudomonas* genes, including self-regulation  
64 (autoinduction), cross-regulation between the different quorum sensing systems and regulation of  
65 bacterial virulence and biofilm formation (Schuster *et al.*, 2003; Williams and Camara, 2009).  
66 Remarkably, about half of the quorum sensing-regulated genes still have an unknown function  
67 (Schuster *et al.*, 2003). Besides cell density, the quorum sensing systems can also be influenced by  
68 environmental factors such as phosphate-limiting conditions (Lee *et al.*, 2013) and oxidative stress  
69 (Häussler and Becker, 2008). For example, the PQS system plays a key role in protecting a micro-colony  
70 by both stimulating the destruction of damaged sister cells and rescuing undamaged members from  
71 oxidative stress by lowering their metabolic activity (D'Argenio *et al.*, 2002; Häussler and Becker, 2008).  
72 Phages have evolved mechanisms to interfere with their host's quorum sensing systems, possibly (i) to  
73 overcome the CRISPR-Cas mediated phage resistance, (ii) to oppose quorum sensing-mediated  
74 downregulation of specific phage receptors (Høyland-Kroghsbo *et al.*, 2013), (iii) to control biofilm  
75 formation (Pei and Lamas-Samanamud, 2014), (iv) to influence the quorum sensing-regulated cell  
76 physiological state which naturally protects bacteria against phage attacks (Qin *et al.*, 2017), (v) to alter  
77 bacterial behavior via response regulators to enhance phage production, or (vi) to utilize the quorum  
78 sensing molecule as a carbon source for phage progeny (Müller *et al.*, 2014). In the *Clostridium difficile*  
79 phage phiCDHM1, three AMGs from the host accessory gene regulator (*agr*) quorum sensing system  
80 (*AgrB*, *AgrC* and *AgrD*) were proposed, while response regulators associated with this system have  
81 been predicted in three *Pseudomonas* phages (Hargreaves *et al.*, 2014). Furthermore, *Iodobacter*  
82 phage  $\phi$ PLPE encodes a putative acylhydrolase, for which its bacterial homolog degrades the AHL  
83 signal molecules (Leblanc *et al.*, 2009), and *Vibrio* phage VP882 encodes a quorum sensing receptor  
84 homolog that guides the lysis-lysogeny decision (Maxwell, 2019; Silpe and Bassler, 2019). So far, no

85 mechanisms in phages are known to interfere with PQS signaling. Nevertheless, a recent observation  
86 by our group hints at an important role of the PQS signal in the host response to phage infection  
87 (Blasdel *et al.*, 2018; De Smet *et al.*, 2016).

88 Phage LUZ19 is a podovirus of the *Autographivirinae* subfamily, for which the genome organization has  
89 been intensely studied (Lavigne *et al.*, 2013). We here show that a protein expressed during early  
90 infection, Gp4 (termed Qst, 'quorum sensing-associated acyltransferase), modulates the PQS levels in  
91 the host, resulting in toxicity and metabolic reprogramming. This function is associated with  
92 acyltransferase activity and is achieved by a complex interaction network, in which Qst interacts with  
93 enzymes of both central carbon metabolism and two signaling molecule biosynthesis pathways: i) the  
94 well-known quorum sensing molecule PQS and ii) a predicted non-ribosomal peptide (the PA1221  
95 cluster; Gulick, 2017). The interacting protein of the latter pathway is also able to neutralize the  
96 antibacterial effect of Qst, hinting a phage-mediated effect on cell signaling. The further exploration  
97 of these novel phage-host interactions may lead to insights that could aid in the development of new  
98 antibacterial therapies targeting quorum sensing (Fetzner, 2015).

99 **Results**

100 **An early-expressed phage LUZ19 protein shows antibacterial activity in *P. aeruginosa*, which is**  
101 **complemented by the hypothetical protein PA1217**

102 During a screen for growth-inhibitory ORFans in *P. aeruginosa* PAO1-infecting phages, the early  
103 expressed protein Gp4 of phage LUZ19 (referred to hereafter as Qst) was identified (Wagemans *et al.*,  
104 2014). Upon induction of Qst, *P. aeruginosa* growth was completely abolished (Figure 1A) and a  
105 filamentous growth type was observed (Figure 1B). Interestingly, this toxicity is rather specific, as *E coli*  
106 MG1655 cells grew normally after episomal expression of Qst. Qst has a predicted molecular weight  
107 of 13 kDa, has no conserved domains and is only found in *Kmvvirus* phages.

108 To study the mechanisms underlying this toxicity, we performed a complementation screen to identify  
109 bacterial proteins that can alleviate this toxic effect upon overexpression. The twenty confirmed  
110 positive clones containing random *P. aeruginosa* PAO1 genome fragments all matched to a single locus  
111 in the *Pseudomonas* genome, with five different fragments that overlapped by 3,227 bp (position  
112 1,316,424-1,319,651 bp, minus-strand) encoding two putative ORFs, PA1216 and PA1217. After  
113 individual cloning into a *Pseudomonas* expression vector and expression of PA1216 or PA1217 in the  
114 Qst expressing *P. aeruginosa* PAO1 strain, a spot test and microscopic analysis revealed that  
115 overexpression of PA1217 can partially complement the toxic effect of the phage protein on the host  
116 cells (Figure 1A,B).

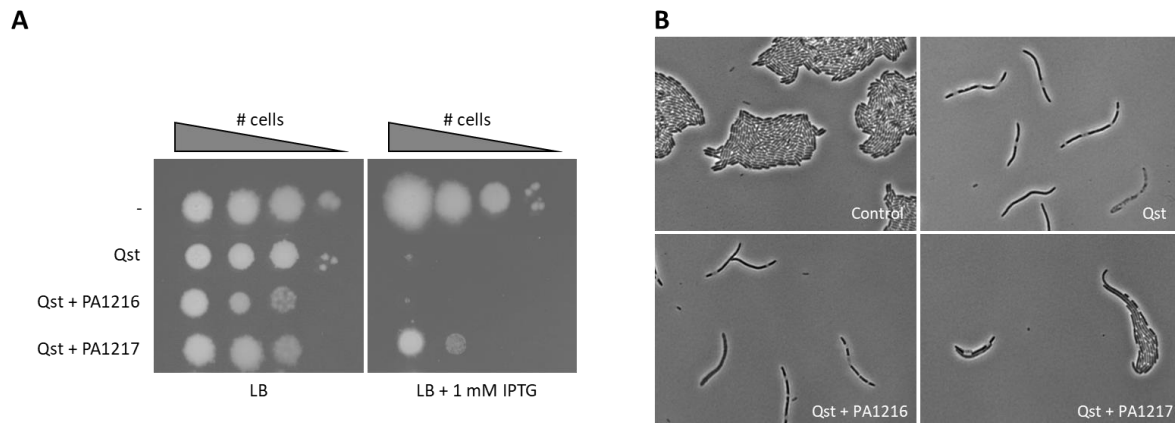

117

118 **Figure 1. Antibacterial effect of the early phage protein Qst on *P. aeruginosa* PAO1 growth and its partial**

119 **complementation by the hypothetical protein PA1217. (A) Hundredfold serial dilutions of *P. aeruginosa* PAO1**

120 **strains harboring the *qst* gene (second row), both *qst* and PA1216 genes (third row), and both *qst* and PA1217**

121 **genes (bottom row) were spotted on medium with (right) or without (left) IPTG induction, together with a**

122 **negative control (empty vector construct, top row). (B) *P. aeruginosa* PAO1 morphology after Qst expression (top**

123 **right), and both Qst and PA1216/PA1217 expression (bottom), together with a control (empty vector construct,**

124 **top left). Microscopic recording of *P. aeruginosa* cells after growth for 5 h in the presence of 1 mM IPTG.**

### 125 **Qst binds to the predicted CoA acetyltransferase region of PA1217**

126 To test whether the antibacterial effect of Qst was due to direct protein-protein interaction with

127 PA1217, we performed both *in vitro* and *in vivo* interaction analyses. First, a native gel mobility shift

128 assay with an equal amount of recombinant PA1217 and an increasing amount of Qst protein displayed

129 a small but distinct shift in PA1217 migration in presence of Qst. Excising and loading the shifted band

130 from the native gel on a denaturing gel, proved the presence of both PA1217 and Qst in the shifted

131 band (Figure 2A). Furthermore, an ELISA using PA1217 as bait and Qst as prey further validated this

132 interaction, as an interaction was observed independently from the quantity of Qst and the ratio

133 between Qst and PA1217 (Figure 2B). Together, these results confirmed that Qst directly interacts with

134 PA1217 *in vitro*.

135 Follow-up *in vivo* validation of this interaction and specification of the interaction site using bacterial

136 two-hybrid showed significant ( $p < 0.05$ ) positive reactions for Qst with both the full PA1217 protein

137 and its N-terminal part (residues 1-342), containing a catalytic HMGL (hydroxymethylglutaryl-

138 coenzyme A lyase)-like domain. However, the HMGL-like domain alone (residues 1-259) did not appear  
 139 to bind Qst, perhaps due to lack of proper folding of this fragment (Figure 2C, Figure 2-figure  
 140 supplement 1).

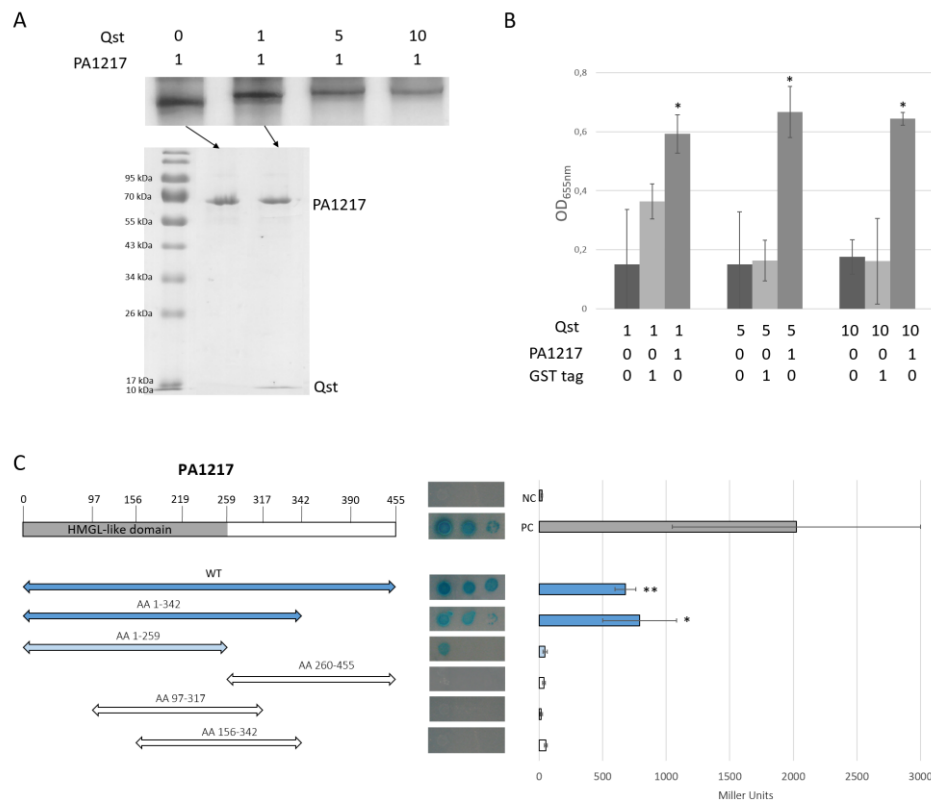

141

142 **Figure 2. Interaction analyses of Qst and the *P. aeruginosa* hypothetical protein PA1217**

143 (A) Native gel mobility shift assay using an equal amount of PA1217 and an increasing amount of Qst (top). The  
 144 band in lane 1 and the shifted band in lane 2 were excised and analyzed via SDS-PAGE (bottom). The numbers  
 145 indicate the relative amount of Qst and PA1217 (4 pmol). (B) Enzyme-linked immunosorbent assay using an equal  
 146 amount of GST-tagged PA1217 (10 pmol) as bait and an increasing amount of His-tagged Qst as prey. As negative  
 147 controls, no bait protein and GST tag were used. The numbers indicate the relative amount of Qst, PA1217 and  
 148 GST tag. The Y-axis indicates the absorbance measured at OD<sub>655nm</sub> after 10 min, using Anti-Mouse IgG antibody  
 149 conjugated to HRP and 1-Step Slow TMB-ELISA substrate. Error bars represent standard deviation and *P*-values  
 150 (compared to no bait protein and GST tag separately) were calculated using the Student's t-test (n=3), \**p*<0.05.  
 151 (C) Bacterial two-hybrid assay in which the T18 domain is N-terminally fused to Qst and the T25 domain is N-  
 152 terminally fused to PA1217 or a fragment of PA1217. Fragments of the PA1217 protein are shown on the left.  
 153 Blue and white arrows indicate fragments with a positive and no signal, respectively. Interactions were visualized



154 by a drop test on minimal medium (pictures in the middle), and quantified by measuring the  $\beta$ -galactosidase  
155 activity, which are indicated in Miller Units (graph at the right; Figure 2-figure supplement 1). Non-fused T25 and  
156 T18 domains were used as a negative control, and the leucine zipper of GCN4 was used as a positive control.  
157 Error bars represent standard deviation and *P*-values (compared to both combinations with empty counterparts)  
158 were calculated using the Student's t-test (n=3), \*p<0.05, \*\*p<0.01.

### 159 **Qst and its interaction partner PA1217 both show acyltransferase activity**

160 The *P. aeruginosa* protein PA1217 is predicted as a probable 2-isopropylmalate synthase, containing  
161 an HMGL-like domain (residues 1-259; Pfam, E-value: 1.2e-61). Isopropylmalate synthases belong to  
162 the DRE-TIM metallolyase superfamily, which share a TIM-barrel fold, an HXH divalent metal binding  
163 motif and a conserved active site helix (Casey *et al.*, 2014). In *P. aeruginosa* one functional homolog is  
164 known, LeuA, which catalyzes the first step in leucine biosynthesis. To verify the 2-isopropylmalate  
165 synthase activity, acetyl-Coenzyme A to Coenzyme A (CoA) conversion was assayed *in vitro* (Roucourt  
166 *et al.*, 2009). Although both the positive control LeuA and PA1217 showed transferase activity, the  
167 activity of PA1217 was markedly lower, suggesting the absence of its natural substrate (Figure 3).  
168 <sup>1</sup>H-NMR analysis confirmed this assumption, as products were only formed by LeuA, while PA1217  
169 merely consumed acetyl-CoA (Figure 3-figure supplement 1). PA1217 is embedded in an  
170 uncharacterized non-ribosomal peptide synthetase (NRPS) cluster (Gulick, 2017), controlled by  
171 quorum sensing regulation and producing a potential novel cell-to-cell signaling molecule, which may  
172 explain the lack of 2-isopropylmalate synthase activity as it possibly functions in the modification of  
173 the non-ribosomal peptide and has therefore alternative substrate specificity. Also in other NRPS  
174 clusters, homologs of 2-isopropylmalate synthases are identified (Jenul *et al.*, 2018; Rouhiainen *et al.*,  
175 2010).

176 Based on the interaction analysis, we tested a possible inhibitory effect by Qst on the enzymatic activity  
177 of PA1217. Surprisingly, however, we observed that Qst was also able to consume acetyl-CoA, and a  
178 Qst/PA1217 combination showed additive enzymatic activity (Figure 3, Figure 3-figure supplement 1).

179 These data suggest that the small early-expressed phage protein Qst interferes with acetyl-CoA  
 180 metabolism in the cell.

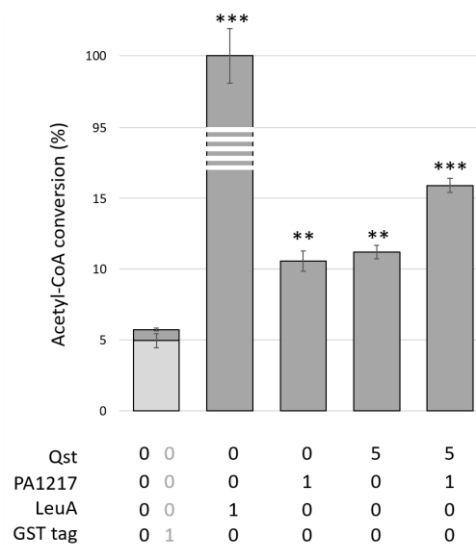

181

182 **Figure 3. CoA acetyltransferase activity assay.** The acetyl-CoA transferase activity was measured using the  
 183 Ellman's reagent (DTNB) after 30 min incubation at 37°C, and expressed relative to the activity of the  
 184 *P. aeruginosa* 2-isopropylmalate synthase LeuA. Error bars represent standard deviation and *P*-values (compared  
 185 to both controls) were calculated using the Student's t-test (n=3), \*\*p<0.01, \*\*\* p<0.001. The numbers below  
 186 indicate the relative amount of the proteins, i.e. 1 µg of PA1217 and 5 µg of Qst were used in the reaction  
 187 mixtures.

### 188 **Untargeted metabolomics reveals alterations in the central carbon metabolism and the** 189 ***Pseudomonas* quinolone signal (PQS) pathway**

190 To investigate the function of Qst during phage infection, we employed untargeted metabolomics to  
 191 identify host metabolic pathways which are either directly or indirectly affected by Qst. We compared  
 192 metabolite levels between *P. aeruginosa* PAO1 expressing recombinant Qst and the wild-type strain,  
 193 the strain overexpressing PA1217 or the one expressing both Qst and PA1217. In total, the level of  
 194 1,140 known metabolites (from the KEGG database (Kanehisa and Goto, 2000)) were monitored before  
 195 and at various time points after Qst expression (15, 30, 45, 60, 90 and 120 min).

196 Upon Qst expression, only nine metabolites changed significantly ( $\text{abs}(\log_2(\text{FC})) > \log_2(1)$ ) and *p*-value  
 197 < 0.05) in at least a single time point of the experiment compared to the wild type and showed a

198 significant change over time (Page's trend test: false discovery rate (FDR) < 0.05), as shown on the  
199 heatmap of fold-changes (Figure 4A).

200 These significantly changed metabolites include pantothenate and 4-phosphopantothenate, which are  
201 precursors for the biosynthesis of both cofactors CoA and 4-phosphopantetheine. Lipoate, another  
202 metabolite that is significantly reduced upon Qst expression, functions like CoA and  
203 4-phosphopantetheine as an acyl carrier cofactor (Hazra *et al.*, 2009; Spalding and Prigge, 2010),  
204 showing that Qst indeed affects acyltransferase metabolism. This reduction in cofactor precursors  
205 could be the result of potential overconsumption of acyl carrier factors (indirect effect) or a potential  
206 overactivation of biosynthesis enzymes (through direct interaction). Within this context it is interesting  
207 to note that 4-phosphopantetheine is also an essential cofactor for peptidyl carrier proteins, like the  
208 NRPS PA1221 belonging to the same secondary metabolite biosynthesis gene cluster as PA1217  
209 (Mitchell *et al.*, 2012). Furthermore, the CoA biosynthesis pathway is known to influence the thiamine  
210 biosynthesis pathway, which could explain the increase of the cofactor thiamine pyrophosphate  
211 precursor 2-methyl-4-amino-5-hydroxymethylpyrimidine diphosphate (Enos-Berlage and Downs,  
212 1997).

213 Another interesting observation is the clear decrease in quorum sensing molecule 2-heptyl-4(1H)-  
214 quinolone (HHQ) upon Qst expression (Figure 4A). This molecule is synthesized by the gene products  
215 of *pqsABCD* and is a precursor of the quorum sensing molecule 2-heptyl-3-hydroxy-quinolone (PQS),  
216 which is also decreased ( $\log_2(\text{FC}) > \log_2(1)$  and  $p\text{-value} < 0.07$ ) in all time points after Qst expression  
217 (Figure 4-Source Data 1). However, it should be noted that both changes are already present prior to  
218 Qst induction, which might be the result of background transcription levels (Choi *et al.*, 2005).  
219 Nevertheless, an additional decrease in metabolite levels of HHQ is observed 45 min after induction  
220 (Figure 4-figure supplement 1). Furthermore, the metabolite level pattern of PQS in the double  
221 expression mutant suggests an initial decrease by Qst, which is subsequently complemented by  
222 PA1217 (Figure 4-figure supplement 1). Also, the most abundant quinolone produced from the PQS

223 biosynthesis pathway, 2,4-dihydroxyquinoline (DHQ) (Zhang *et al.*, 2008), is less abundant in  
 224 *P. aeruginosa* expressing Qst compared to the strains overexpressing PA1217 and expressing both  
 225 Qst/PA1217 (Figure 4-figure supplement 1). DHQ can bind to the PQS specific transcription regulator  
 226 PqsR (similar to HHQ and PQS) and is therefore thought to also play a role in *P. aeruginosa*  
 227 pathogenicity (Gruber *et al.*, 2016). To confirm the reduced levels of PQS upon Qst expression, a PQS  
 228 bioassay with the *P. aeruginosa* PAO1-R1 (pTS400) *lacZ* reporter strain (Van Houdt *et al.*, 2004)  
 229 revealed a reduced reaction compared to the other strains. This indeed indicates a lower concentration  
 230 of PQS present in the cell lysate (Figure 4B).

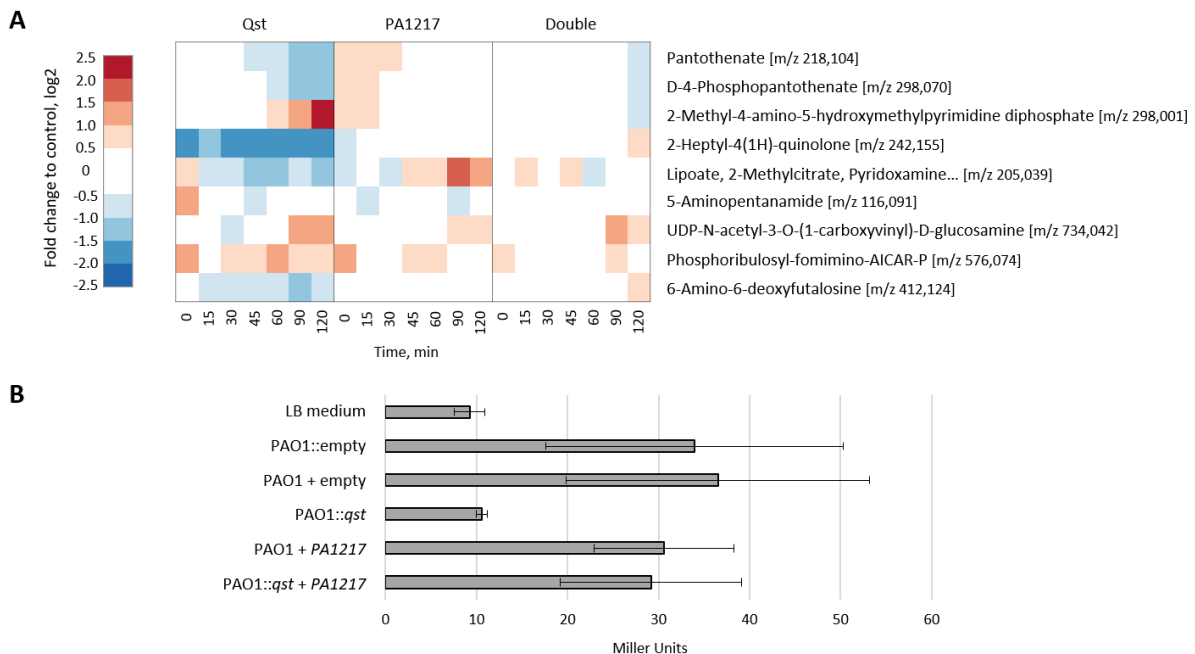

231  
 232 **Figure 4. Impact of Qst on metabolite levels in *P. aeruginosa*.** (A) Heatmap of significantly changed metabolites  
 233 after recombinant Qst expression. Only metabolites that meet the following criteria are shown: Page FDR < 0.05,  
 234 and at least one time point with an  $\text{abs}(\log_2(\text{FC})) > \log_2(1)$  and  $p\text{-value} < 0.05$  (both compared to the wild type).  
 235 Levels of selected metabolites in a *P. aeruginosa* PAO1 strain overexpressing PA1217, and in a strain both  
 236 expressing Qst and PA1217 (double) are shown as well. Fold changes represent the means of three biological  
 237 replicates. (B) PQS bioassay. Cell lysates of 1 mM IPTG-induced, stationary growing *P. aeruginosa* PAO1 strains  
 238 containing an empty pUC18mini construct (PAO1::empty), an empty pME6032 vector (PAO1 + empty), a  
 239 pME6032 vector with *PA1217* gene (PAO1 + *PA1217*), a pUC18mini construct with *qst* gene (PAO1::*qst*), and a  
 240 pUC18mini construct with *qst* gene and a pME6032 vector with *PA1217* gene (PAO1::*qst* + *PA1217*) were added

241 to *P. aeruginosa* PAO1-R1 (pTS400) cultures. The experiment was quantified by measuring the  $\beta$ -galactosidase  
242 activity, which are indicated in Miller Units. Error bars represent standard deviations (n=3).

243 **Qst interacts with both quorum sensing-associated secondary metabolite and central metabolism**  
244 **pathways**

245 Based on the observed influence of Qst on a range of metabolic pathways, we hypothesized that Qst  
246 physically interacts with additional enzymes beyond PA1217. To identify such additional interaction  
247 partners, we performed an *in vitro* pull-down using immobilized His-tagged Qst protein as bait and  
248 crude *Pseudomonas* cell lysate as prey. The elution fractions showed additional protein bands  
249 compared to the control sample (Figure 5A). We analyzed both samples with ESI-MS/MS and identified  
250 a total of 104 proteins, including Qst (total spectral count = 29). Interestingly, three enzymes which  
251 were not present in the control sample but were pulled-down when the cell lysate was incubated with  
252 Qst, could be directly associated to the observed metabolic changes: CoaC, ThiD, and PqsD (Figure 5-  
253 Source Data 1). Upon recombinant Qst expression in *P. aeruginosa* the levels of 4-  
254 phosphopantothenate, the substrate of CoaC (phosphopantothenoylcysteine synthase/4'-phospho-N-  
255 pantothenoylcysteine decarboxylase) decreased, whereas the levels of 2-Methyl-4-amino-5-  
256 hydroxymethylpyrimidine diphosphate, the product of ThiD (phosphomethylpyrimidine kinase)  
257 increased, suggesting an overactivation of these enzymes. The third pulled-down enzyme, PqsD (3-  
258 Oxoacyl-(acyl carrier protein) synthase III) is a key enzyme of the PQS biosynthesis pathway, which can  
259 explain the observed decrease in PQS, HHQ and DHQ levels (Figure 4A).

260 A subsequent bacterial two-hybrid experiment with Qst, PA1217, CoaC, PqsD and ThiD consolidated  
261 the identified interactions, and revealed a complex network of mutual interactions between these  
262 proteins (Figure 5B, Figure 5-figure supplement 1).

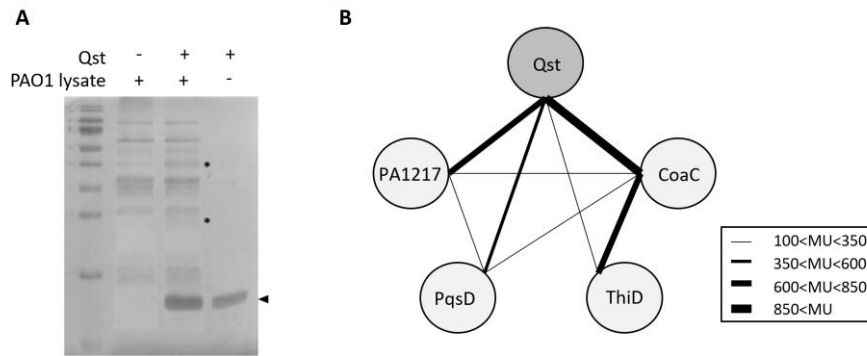

263

264 **Figure 5. Interaction analyses of Qst and *P. aeruginosa* proteins.** (A) *In vitro* pull-down of *P. aeruginosa* cell

265 lysate, using His-tagged Qst as bait. Eluted samples were loaded on a 16% SDS-PAGE gel. The arrow indicates the

266 band of Qst and the asterisks indicate the bands in both control and pull-down sample submitted for

267 identification by mass spectrometry analysis. (B) Bacterial two-hybrid assay in which the T18 domain was N-

268 terminally fused to Qst, PA1217, PqsD or ThiD and the T25 domain was N-terminally fused to PA1217, PqsD, CoaC

269 or ThiD. Interactions were quantified by measuring the  $\beta$ -galactosidase activity using the Miller assay and the

270 results (means of three biological replicates (n=3)) are visualized with black lines, MU = Miller units.

## 271 **The PQS quorum sensing system plays a key role in LUZ19 infection**

272 A recent transcriptome analysis suggested that PQS is involved in a general host response to phage

273 infection (Blasdel *et al.*, 2018). To further investigate the host response, we reanalyzed a metabolomics

274 dataset of the *Pseudomonas* phage infection process (De Smet *et al.*, 2016), that reported that phage

275 LUZ19 may target the PQS production at a post-transcriptional level. Indeed, upon LUZ19 infection,

276 the metabolite levels of PQS were not increased, contrary to other *P. aeruginosa* infecting phages

277 (Figure 6A, Figure 6-Source data 1). We tested several deletion mutants of the PQS biosynthesis

278 pathway and found that a functional PqsD is important for an efficient LUZ19 infection (Figure 6B,C,

279 Figure 6-figure supplement 1). This suggests that the interaction between Qst and PqsD has a pivotal

280 role in host manipulation. Moreover, when supplementing the medium with HHQ, a normal LUZ19

281 infection in the *pqsD* deletion mutant was observed (Figure 6C), proving that LUZ19 exploits this

282 quorum sensing system during phage infection.

283 A comparison of the metabolomes between phages-infected *P. aeruginosa* (De Smet *et al.*, 2016) and

284 bacteria expressing Qst also supported the identified interaction with CoaC. Indeed, we observed a

285 clear discrepancy in metabolite levels of the upstream products of CoaC (pantothenate and 4-  
 286 phosphopantothenate) between LUZ19 and other *P. aeruginosa* infecting phages, all except phage YuA  
 287 (Figure 6A).

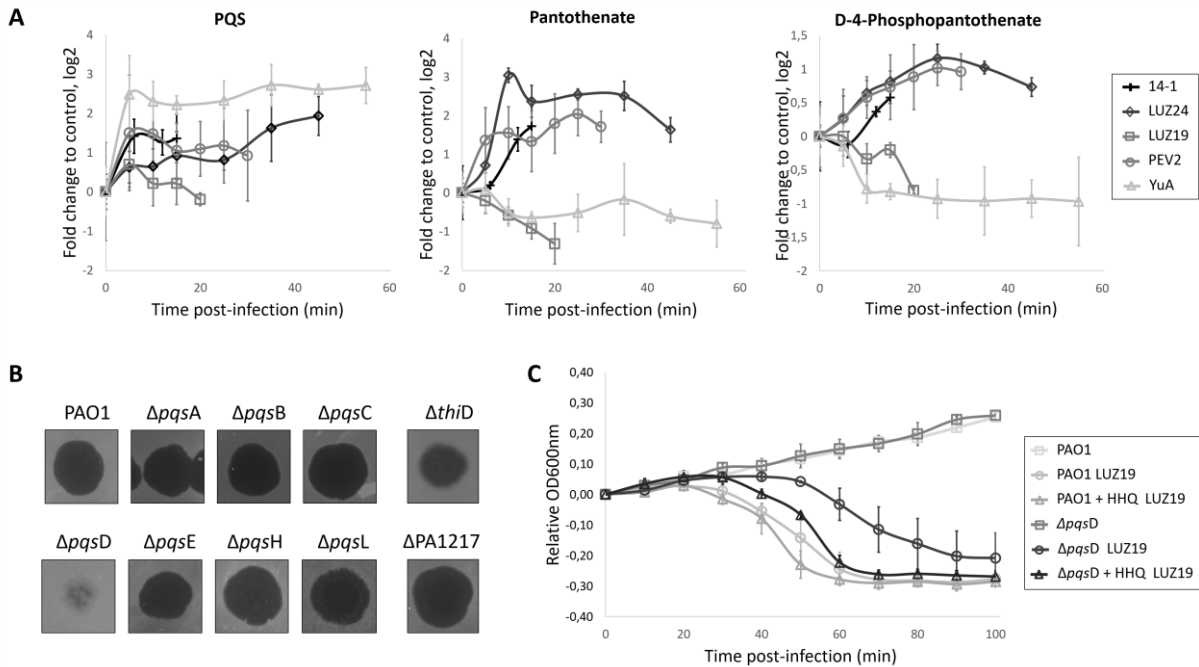

288

289 **Figure 6. Role of Qst during LUZ19 infection.** (A) Comparison of PQS, pantothenate and 4-phosphopantothenate  
 290 metabolite levels in wild-type *P. aeruginosa* strains infected with different, unrelated clades of phages including  
 291 14-1, LUZ24, PEV2 and YuA (Ceyskens and Lavigne, 2010). The high-coverage metabolomics data of the  
 292 *P. aeruginosa* phage infections were obtained from De Smet *et al.* (2016). Fold changes were calculated in  
 293 comparison to control samples and normalized to time 0 of infection. Error bars represent fold change standard  
 294 deviations (n=3). (B) Spot assay of phage LUZ19 on transposon mutants, in which approximately 10 plaque-  
 295 forming units (pfu) of LUZ19 were spotted on a bacterial lawn. (C) Growth curves of *P. aeruginosa* PAO1 wild  
 296 type and *pqsD* transposon mutant with or without LUZ19 infection, and supplemented with 100 μM HHQ.  
 297 Exponentially growing *P. aeruginosa* cells (OD<sub>600nm</sub> of 0.3) were infected with a multiplicity of infection (MOI) of  
 298 10 and followed over time. Each data point represent the mean of the OD<sub>600nm</sub>, normalized to time 0 of infection,  
 299 of three replicates and error bars represent standard deviations (n=3).

## 300 Discussion

301 Lytic bacteriophages have only a limited time period of a few minutes in which they hijack the host  
302 metabolism for phage production. In this process, early-expressed proteins perform specialized  
303 functions with extensive phenotypical effects on the host cell (Roucourt and Lavigne, 2009; Wagemans  
304 *et al.*, 2015, 2014). This work presents a phage-encoded quorum sensing and general host metabolic  
305 influencing protein, which was shown to be part of a previously unknown interaction network and to  
306 cause a specific inhibitory activity to the growth of *P. aeruginosa*.

307 **Qst targets a complex functional interaction network.** By combining metabolomics and interactomics  
308 (both *in vivo* and *in vitro*), we identified four interaction partners of Qst with high confidence. Two  
309 interaction partners are involved in the central carbon metabolism (CoaC and ThiD) and two are part  
310 of a well-studied (PqsD) and a predicted (PA1217) signaling molecule biosynthesis pathway. Since Qst,  
311 PA1217 and PqsD all share an acyltransferase activity, for which CoaC supplies the cofactor CoA and 4-  
312 phosphopantetheine (prosthetic group in acyl carrier proteins) (Kanehisa and Goto, 2000), we suggest  
313 that there is a connection between the physical interactions and functional relationships. The binary  
314 interactions between PA1217, PqsD and CoaC possibly support an efficient channeling of metabolites  
315 and might impose an additional level of regulation to these enzymes. Furthermore, the identified  
316 interaction between ThiD and CoaC is in concordance with the known connection between the two  
317 vitamin-associated pathways they are part of, namely of thiamine and CoA respectively (Enos-Berlage  
318 and Downs, 1997; Frodyma *et al.*, 2000). The fact that ThiD does not show an interaction neither with  
319 PA1217 nor with PqsD further supports our results, since no relationships between these enzymes are  
320 reported. Interestingly, the interactions CoaC-PqsD and CoaC-ThiD were predicted using a machine  
321 learning-based integrative approach (Zhang *et al.*, 2012).

322 Qst targets multiple enzymes and thereby affects multiple metabolic pathways, including two central  
323 metabolic pathways and quorum sensing. This broad impact may explain the growth-inhibitory effect  
324 of Qst on *P. aeruginosa* cells and highlights the extent of evolutionary molecular adaptation by LUZ19



325 to its host. It is unclear how Qst influences these enzymes. However, the interaction between Qst and  
326 the catalytic part of PA1217 indicates a potential influence of Qst on the enzymatic activity or  
327 specificity of its targets. Also the direct effect of Qst on the substrate and product levels of CoaC and  
328 ThiD respectively, suggests a phage-mediated overactivation of these enzymes. Since all interaction  
329 partners are linked with each other forming a functional network, it can be hypothesized that Qst has  
330 a regulatory function, possibly through post-translational modification or direct protein-protein  
331 interactions.

332 **Metabolic changes mark Qst as an influencer of the PQS-mediated host response to phage infection.**

333 One of the key observations is the reduction of metabolite levels in *P. aeruginosa* of the downstream  
334 products of PqsD (DHQ, HHQ and PQS) when recombinant Qst is present in the cell. To our knowledge,  
335 this is the first report of a phage protein influencing PQS. Targeting PQS can have a major impact on  
336 the host cell's physiological state, as PQS is one of the main quorum sensing systems in *P. aeruginosa*,  
337 implicating that it impacts pathogenicity but also general metabolic functions like cofactor biosynthesis  
338 and fatty acid metabolism (Häussler and Becker, 2008; Schuster and Greenberg, 2006). Besides  
339 quorum sensing signaling, PQS has also been implicated in iron acquisition, cytotoxicity, outer-  
340 membrane vesicle biogenesis, and modulation of the host immune response (Lin *et al.*, 2018), making  
341 it a key regulatory hub to stress conditions, for example during phage infection.

342 Previous transcriptomics data from our lab indicates that PQS is responsible for a general host response  
343 to phage infection, by significantly upregulating the *pqsABCDE* operon and the co-regulated *phnAP*  
344 operon during infection of several distinct lytic *P. aeruginosa* infecting phages (Blasdel *et al.*, 2018).  
345 Despite a general PQS transcription response to phage infection, an increase of metabolite levels has  
346 not been observed for phage LUZ19 contrary to other *P. aeruginosa* infecting phages (De Smet *et al.*,  
347 2016). This was the first indication that LUZ19 may encode a protein which prevents PQS production  
348 on the post-transcriptional level or exploits this system to support its infection, and our results reveal  
349 that Qst is the responsible protein. Since a functional PqsD enzyme is important for efficient LUZ19

350 infection, it can be hypothesized that LUZ19 not specifically tackles host response but rather uses the  
351 PQS biosynthesis system to create a favorable environment for phage production, for example by  
352 changing the PqsD activity or its products through acylation by a still unknown mechanism. Indeed,  
353 external supplementation of the quorum sensing molecule to *P. aeruginosa* cells lacking PqsD restored  
354 normal LUZ19 infection.

355 PA1217 is also part of a predicted signaling molecule biosynthesis pathway, namely the NRPS cluster  
356 PA1221 (Gulick, 2017). It can therefore also be hypothesized that there is a link between these two  
357 cell-to-cell signaling systems, which produce stress-related metabolites, suggesting a host response to  
358 phage infection. Indeed, PA1217 and related proteins belonging to the same cluster (PA1218 and  
359 PA1221) are also influenced during phage infection of phages PaP1 (*Myoviridae*) and PaP3  
360 (*Podoviridae*), respectively (Zhao *et al.*, 2017, 2016). Future work will aim at identifying and  
361 characterizing this secondary metabolite to unravel its function in *P. aeruginosa* and its role during  
362 phage infection, as a potentially extra quorum sensing mechanism.

363 **Qst can be a valuable study tool in the battle against antibiotic resistant *P. aeruginosa*.** The use of  
364 quorum sensing by bacteria to resist phage infection has recently been suggested (Hoyland-Kroghsbo  
365 *et al.*, 2017, 2013; Patterson *et al.*, 2016; Qin *et al.*, 2017). However, the opposite, in which phages  
366 target quorum sensing to counter the bacterial defense mechanism or to create a favorable  
367 environment for phage infection has, to our knowledge, never been observed. The fact that Qst targets  
368 PqsD is even more intriguing, as this enzyme catalyzes the last and key step in HHQ biosynthesis, which  
369 make it a widely studied anti-virulence and anti-biofilm target to combat *P. aeruginosa* infections  
370 (Storz *et al.*, 2012; Weidel *et al.*, 2013; Zhou and Ma, 2017). Furthermore, the Qst interaction partners  
371 CoaC and ThiD are studied for their antibacterial drug target potential, as they are different in  
372 eukaryotic cells and inhibition will lead to the depletion of vitamins, thereby damaging the growth of  
373 cells (Du *et al.*, 2011; O'Toole and Cygler, 2003).

## 374 **Material and methods**

### 375 *Phages and bacterial strains*

376 *Pseudomonas aeruginosa* PAO1 and derivatives were used in this study (Stover *et al.*, 2000). Strain  
377 PAO1-R1, a *lasR*:*lasI* mutant containing the pTS400 plasmid (*lasB*'-lacZ translational fusion), was used  
378 for the PQS bioassay (Gambello and Iglewski, 1991). Transposon deletion mutants were ordered from  
379 the *P. aeruginosa* mutant library (Jacobs *et al.*, 2003): PW2799, PW2800, PW2803, PW2805, PW2806,  
380 PW5343, PW8105, PW7728, PW3198. A *P. aeruginosa* PAO1 strain with single-copy integration of the  
381 phage gene under a lac promoter into the bacterial genome was made using the Gateway cloning  
382 system (Invitrogen, Carlsbad, CA), as described previously (Hendrix *et al.*, 2019). Three *Escherichia coli*  
383 strains were used: *E. coli* TOP10 (Life Technologies, Carlsbad, CA) for cloning procedures, *E. coli* BTH101  
384 (Euromedex, Souffelweyersheim, F) for Bacterial two-hybrid assays and *E. coli* BL21(DE3) (Life  
385 Technologies) for recombinant protein expression.

### 386 *P. aeruginosa* PAO1 genome fragment library construction

387 A *P. aeruginosa* PAO1 fragment library was constructed by ligating genomic DNA fragments into the  
388 pHERD20T vector (Qiu *et al.*, 2008). For this, restriction enzymes AluI and RsaI (Thermo Scientific,  
389 Waltham, MA) were applied to fragment 37.5 µg purified genomic DNA, and restriction enzyme SmaI  
390 (Thermo Scientific) was used to digest 3 µg pHERD20T vector according the manufacturer's protocol.  
391 The fragments with lengths between 1.5 kbp and 4 kbp were isolated using gel extraction and  
392 concentrated by ethanol precipitation. The digested vector, on the other hand, was treated with  
393 alkaline phosphatase FastAP (Thermo Scientific). The ligation reaction mixture, with a total volume of  
394 20 µl, contained a three-fold excess of DNA fragments compared to the pHERD20T vector (50 ng), 1 µl  
395 T4 DNA ligase, 2 µl T4 buffer and 2 µl 50% PEG4000 (Merck, Kenilworth, NJ). After incubation, the  
396 entire library was transformed to chemically competent *E. coli* TOP10 cells and the number of  
397 transformants was determined.

398 *Complementation assays*

399 The *P. aeruginosa* PAO1 genome fragment library, containing random fragments ranging from 1.5 to 4  
400 kbp inserted in a pHERD20T vector under control of a pBAD promotor, was electroporated (Choi *et al.*,  
401 2006) to the mutant *P. aeruginosa* PAO1 strain encoding *qst*. Cells were grown overnight at 37°C on LB  
402 agar supplemented with gentamicin (30 µg/ml), carbenicillin (200 µg/ml), 1 mM isopropyl-β-D-1-  
403 thiogalactopyranoside (IPTG) and 0.2% L-arabinose (L-ara). Ninety-six colonies were selected and  
404 checked for false positive hits by repeating the growth step on selective media. The plasmids of the  
405 positive hits were isolated using the GeneJET Plasmid Miniprep Kit (Thermo Scientific) and transformed  
406 afresh to the *P. aeruginosa* *qst* strain to verify if the phenotype is indeed due to the presence of the  
407 fragment. After confirmation, a single colony was picked to perform a spot test. From each overnight  
408 culture, a hundredfold dilution series was spotted in triplicate on LB agar with or without IPTG/L-ara  
409 and overnight incubated at 37°C. To determine the location of the fragments in the *P. aeruginosa*  
410 genome, the sequencing results were analysed with Basic Local Alignment Search Tool (BLAST; NCBI  
411 (Altschul *et al.*, 1990)) and the *Pseudomonas* Genome Database (Winsor *et al.*, 2016). Individual genes,  
412 which were located in the maximal overlap region of the identified fragments, were cloned in the  
413 pME6032 vector (Heeb *et al.*, 2002) for electroporation to the *P. aeruginosa* *qst* strain. Again, a dilution  
414 series was spotted on LB with and without 1 mM IPTG and incubated overnight at 37°C. As a negative  
415 control, the empty pME6032 vector was used.

416 *Time-lapse microscopy*

417 Microscopic analysis was performed according to a previously described procedure (Wagemans *et al.*,  
418 2014). Briefly, an overnight culture of *P. aeruginosa* cells, containing a single-copy *qst* expression  
419 construct and the multicopy expression vector pME6032 with or without bacterial gene, was diluted  
420 thousand times and spotted on LB agar supplemented with gentamicin (30 µg/ml), tetracycline (60  
421 µg/ml) and 1 mM IPTG. Time-lapse microscopy was performed for 5 h at 37°C with a temperature  
422 controlled Nikon Eclipse Ti time-lapse microscope using the NIS-Elements AR 3.2 software (Cenens *et*  
423 *al.*, 2013).

424 *Protein expression and purification*

425 Qst was fused to a His-tag using the pEXP5-CT/TOPO vector (Invitrogen) following the TA-cloning  
426 protocol provided by the manufacturer. The bacterial protein PA1217 was fused to a GST-tag by cloning  
427 it into a pGEX-6P-1 vector (GE Healthcare, Chicago, IL) using the BamHI and EcoRI restriction sites  
428 (Thermo Scientific). Recombinant expression of both proteins was performed in exponentially growing  
429 *E. coli* BL21(DE3) cells after induction with 1 mM IPTG at 30°C overnight. The proteins were purified  
430 using a 1 ml HisTrap HP column (GE Healthcare) or 5 ml GSTrap HP column (GE Healthcare), depending  
431 on the fused tag, on an Äkta Fast Protein Liquid Chromatography (FPLC, GE Healthcare) system,  
432 followed by dialysis to storage buffer (50 mM Tris-HCl, pH 7.4, 150 mM NaCl) supplemented with 5%  
433 (PA1217) or 15% (Qst) glycerol and stored at -20°C.

434 *In vitro pull-down*

435 A total of 250 ng of Qst was incubated with 1 ml Ni-NTA Superflow beads (Qiagen, Hilden, DE) in an  
436 end-over-end shaker for 1 h at 4°C. The supernatant was removed by centrifugation at 300 g for 5 min  
437 and the mixture was suspended in 10 ml pull-down buffer (20 mM Tris pH 7.5, 200 mM NaCl, 20 mM  
438 imidazole). The Ni-NTA matrix was loaded on a prepared 1 ml Polypropylene column (Qiagen) and a  
439 filtered *P. aeruginosa* cell lysate was added. For the bacterial lysate, cells were grown in 1 L LB until an  
440 OD<sub>600nm</sub> of 0.6, pelleted and resuspended in 40 ml protein A buffer (10 mM Tris pH 8.0, 150 mM NaCl,  
441 0.1 % (v/v) NP-40) supplemented with 40 mg HEWL and 24 mg Pefabloc®SC. Cell lysis was done by  
442 three freeze-thaw cycles and sonication (40% amplitude, 8 times 30 sec with 30 sec in between). The  
443 column was washed three times with pull-down buffer, after which 500 µl pull-down buffer  
444 supplemented with 500 mM imidazole was added. After briefly vortexing the column and 5 min  
445 incubation at room temperature, the proteins were eluted by centrifugation at 1,000 g for 5 min and  
446 visualized using SDS-PAGE. The protein bands that were present in the pull-down sample but absent  
447 in the control sample (without loaded Qst) were analyzed using mass spectrometry analysis as  
448 described previously (Van den Bossche *et al.*, 2016).

449 *Native mobility shift assay*

450 Interaction between the phage and bacterial protein was evaluated *in vitro* using a native mobility shift  
451 assay (Van den Bossche *et al.*, 2014). Mixtures of 200  $\mu$ M *P. aeruginosa* PA1217 and an increasing  
452 amount of Qst were incubated in reaction buffer (20 mM Tris, pH 8) for 10 min at room temperature  
453 ( $T_R$ ). After the addition of loading dye (0.2% (w/v) bromophenol blue, 300 mM DTT and 50% (v/v)  
454 glycerol), the samples were loaded on a 10% polyacrylamide native gel (10% (v/v) 37.5:1  
455 acrylamide/bisacrylamide, 10% (v/v) glycerol, 200 mM Tris, pH 8, 0.01% (v/v) APS, 0.001% (v/v) TEMED)  
456 and run in running buffer (25 mM Tris, 250 mM glycine) for 80 min at 150 V. The gel was Coomassie-  
457 stained, the shifted bands were excised from the gel and the gel pieces were loaded on a 12% SDS-  
458 PAGE gel to confirm the presence of both proteins. Furthermore, the proteins were identified using  
459 mass spectrometry analysis as described previously (Van den Bossche *et al.*, 2016).

460 *Enzyme-linked immunosorbent assay (ELISA)*

461 ELISA was performed using anti-GST coated strips (Pierce™ Anti-GST Coated Clear Strip Plates, Thermo  
462 Scientific). A fixed amount of 10 pmol GST-tagged PA1217 was diluted in 200  $\mu$ l PBS (137 mM NaCl, 2.7  
463 mM KCl, 8.2 mM  $\text{Na}_2\text{HPO}_4$ , 1.8 mM  $\text{KH}_2\text{PO}_4$ , pH 7.5) supplemented with 2% (w/v) Bovine serum albumin  
464 (BSA), added to the wells and incubated for 1 h at  $T_R$  while gently shaking. After washing the wells  
465 three times with PBS-Tween 0.1% followed by three times PBS, increasing amounts of His-tagged Qst  
466 were diluted in 200  $\mu$ l PBS + 2% BSA, added to the wells and incubated for 1 h at  $T_R$ . The washing step  
467 was repeated and 200  $\mu$ l of a 1:5,000 dilution of the monoclonal Anti-His antibody (Sigma-Aldrich, St.  
468 Louis, MO) in PBS + 2% BSA was added to each well. After incubating 1 h at  $T_R$ , the wells were washed  
469 and 200  $\mu$ l of a 1:5,000 dilution of secondary Anti-Mouse IgG antibody conjugated to HRP (Promega  
470 Corporation, Madison, WI) in PBS + 2% BSA was added to each well. A final washing step after 1 h  
471 incubation at  $T_R$  was followed by addition of 100  $\mu$ l 1-Step Slow TMB-ELISA substrate (Thermo  
472 Scientific) to each well and absorbance was measured after 10 min incubation at  $T_R$  using the Bio-Rad  
473 Model 680 Microplate Reader (655 nm; Bio-Rad, Hercules, CA). As negative controls, wells without bait

474 protein (GST-tagged PA1217) and pure GST tag were used. Three replicates of each combination were  
475 tested

#### 476 *Bacterial two-hybrid*

477 Bacterial two-hybrid assays were conducted using the BACTH System kit (bacterial adenylate cyclase  
478 two-hybrid system kit, Euromedex). The *P. aeruginosa* genes *PA1217*, *pqsD* and *thiD* were cloned into  
479 four vectors (pUT18, pUT18C, pKT25 and pN25), while the fragments of the former (sequences  
480 encoding amino acid 1–259, 1–342, 97–317, 156–342 and 260–455) were only cloned into pKT25. The  
481 *P. aeruginosa* genes *coaC*, *pqsB* and *pqsC* were cloned into vectors pKT25 and pN25, and the phage  
482 gene *qst* was cloned into the vectors pUT18, pUT18C and pN25. Each combination of phage and  
483 bacterial gene/fragment was co-transformed to *E. coli* BTH101 and dilutions of overnight cultures were  
484 spotted on synthetic minimal M63 medium (15 mM (NH<sub>4</sub>)<sub>2</sub>SO<sub>4</sub>, 100 mM KH<sub>2</sub>PO<sub>4</sub>, 1.7 μM FeSO<sub>4</sub>, 1 mM  
485 MgSO<sub>4</sub>, 0.05% (w/v) vitamin B1, 20% (w/v) maltose) supplemented with 0.5 mM IPTG and 40 μg/ml 5-  
486 bromo-4-chloro-3-indolyl-β-D-galactopyranoside (X-gal). To quantify the β-galactosidase activity,  
487 Miller assays were performed (Zhang and Bremer, 1995). As negative controls, the constructs were co-  
488 transformed with their empty counterparts. Each combination was tested in triplicate.

#### 489 *CoA acetyltransferase activity assay*

490 To measure acetyl-CoA dependent acetyltransferase activity of the bacterial and phage protein, an  
491 end-point assay was performed as previously described (Roucourt *et al.*, 2009). Briefly, the formation  
492 of CoA was determined using 5,5'-dithiobis-(2-nitrobenzoic acid) (DTNB), which reacts with free thiol  
493 groups of CoA. Mixtures of 1 μg PA1217 and/or 5 μg Qst, 2 mM 3-methyl-2-oxobutanoic acid (Fisher  
494 Scientific, Hampton, NH) and 1 mM acetyl-CoA (Sigma-Aldrich) were incubated in a reaction buffer (70  
495 mM Tris, pH7.5, 3.5 mM MgCl<sub>2</sub>, 3.5 mM KCl) for 30 min at 37°C. After the addition of 2 mM DTNB  
496 (Sigma-Aldrich) to each sample, the absorption was measured at 415 nm in a microplate reader  
497 (Microplate reader model 680, Bio-Rad). As a positive and negative control, samples with LeuA and

498 without protein and pure GST tag were tested, respectively. The experiment was performed in  
499 triplicate.

#### 500 *<sup>1</sup>H-NMR analysis*

501 The predicted  $\alpha$ -isopropylmalate synthase activity of PA1217 was studied using <sup>1</sup>H-NMR (de Carvalho  
502 and Blanchard, 2006). Mixtures of 100  $\mu$ g PA1217, 12 mM MgCl<sub>2</sub>, 1.1 mM 3-methyl-2-oxobutanoic acid  
503 and 1 mM acetyl-CoA were incubated in 50 mM potassium phosphate buffer (pH 7.5) for 2 h at 37 °C.  
504 The proteins were removed using Amicon Ultra 3K 0.5 ml centrifugal filters (Millipore, Burlington, MA)  
505 according to the manufacturer's protocol. Lastly, 300  $\mu$ l of D<sub>2</sub>O was added to 300  $\mu$ l of the prepared  
506 mixture. <sup>1</sup>H-NMR spectra were recorded on a Bruker Ascend 600 MHz and 400 MHz spectrometer  
507 equipped with a BBO 5 mm atma probe and a sample case. To suppress the broad signal of water, an  
508 adapted zgpr pulse program (p1 9.75  $\mu$ s; plw1 15W; plw9 5.7-05W; o1P) was applied on the resonance  
509 signal of water, which was determined and selected automatically. The experiment was repeated with  
510 mixtures containing Qst, a combination of Qst and PA1217, and the positive control LeuA.

#### 511 *Metabolomics using FIA-qTOF-MS*

512 Metabolites were extracted from *P. aeruginosa* cells and analyzed following the procedure described  
513 previously (De Smet *et al.*, 2016). Cells were grown until an OD<sub>600nm</sub> = 0.1, 1 mM IPTG was added to  
514 each culture and sampling was done every 15 min. Four strains were tested: PAO1 wild type, PAO1  
515 encoding *qst*, PAO1 containing the multicopy expression vector pME6032 with *PA1217* gene, and PAO1  
516 combining the previous two strains. The samples were analysed using negative mode flow injection-  
517 time-of-flight mass spectrometry (FIA-qTOF). Ions were annotated with KEGG *P. aeruginosa* metabolite  
518 lists (Kanehisa and Goto, 2000), allowing a mass tolerance of 1 mDa and an intensity cutoff of 5000  
519 counts. Raw intensities were quantile normalized (each measurement is an average of two technical  
520 replicates) and fold changes were calculated for each time point between each condition and control  
521 for means of three biological replicates and reported in log<sub>2</sub>. *P*-values were calculated with unpaired t-  
522 test and corrected for multiple hypothesis testing with Benjamini-Hochberg procedure. Page's trend



523 test p-values were calculated using the Matlab Page package:  
524 [http://www.mathworks.com/matlabcentral/fileexchange/14419-perform-page-](http://www.mathworks.com/matlabcentral/fileexchange/14419-perform-page-test?focused=6141676&tab=function)  
525 [test?focused=6141676&tab=function.](http://www.mathworks.com/matlabcentral/fileexchange/14419-perform-page-test?focused=6141676&tab=function)

## 526 *PQS bioassay*

527 The effect of the phage and bacterial protein on the production pattern of PQS autoinducer by  
528 *P. aeruginosa* was tested using the *P. aeruginosa* PAO1-R1 (pTS400) reporter strain (Van Houdt *et al.*,  
529 2004). First, cell-free culture supernatants from tested *P. aeruginosa* strains were prepared as  
530 described by Van Houdt *et al.* (2004) with some modifications. Briefly, overnight cultures of  
531 *P. aeruginosa* cells (over)expressing the *qst* and/or the PA1217 gene were diluted (1:100) in fresh LB  
532 medium and grown for 21 h at 37°C. The cells were then removed by centrifugation (24,000 g) for  
533 10 min and cleared supernatants was filtered using 0.22 µm Millex filter units (Millipore). Next, 2 ml of  
534 the cell-free culture supernatant was mixed with 2 ml of freshly diluted (1:100) *P. aeruginosa* PAO1-  
535 R1 (pTS400) culture in PTSB medium (5% (w/v) peptone, 0.25% (w/v) trypticase soy broth), and  
536 incubated for 18 h at 37°C. The production of reporter enzyme β-galactosidase was measured using  
537 previously mentioned Miller assay (Zhang and Bremer, 1995). The experiment was performed in  
538 triplicate.

## 539 **Acknowledgements**

540 We would like to thank prof. Dirk De Vos (Centre for Surface Chemistry and Catalysis, KU Leuven,  
541 Belgium) for use of the NMR facilities, and Erik Royackers (Hasselt Univeristy, Belgium) for the technical  
542 support in mass spectrometry analysis. This research was supported by the KU Leuven project GOA  
543 'Phage Biosystems'.

## 544 **Competing interests**

545 The authors declare that there are no competing interests.

## References

- 546 Altschul SF, Gish W, Miller W, Myers EW, Lipman DJ. 1990. Basic local alignment search tool. *J Mol*  
547 *Biol* **215**:403–410. doi:10.1016/S0022-2836(05)80360-2
- 548 Blasdel BG, Ceysens P-J, Chevallereau A, Debarbieux L, Lavigne R. 2018. Comparative  
549 transcriptomics reveals a conserved Bacterial Adaptive Phage Response (BAPR) to viral  
550 predation. *bioRxiv* 248849. doi:10.1101/248849
- 551 Casey AK, Hicks MA, Johnson JL, Babbitt PC, Frantom PA. 2014. Mechanistic and bioinformatic  
552 investigation of a conserved active site helix in alpha-isopropylmalate synthase from  
553 *Mycobacterium tuberculosis*, a member of the DRE-TIM metallolyase superfamily. *Biochemistry*  
554 **53**:2915–2925. doi:10.1021/bi500246z
- 555 Cenens W, Mebrhatu MT, Makumi A, Ceysens P-J, Lavigne R, Van Houdt R, Taddei F, Aertsen A.  
556 2013. Expression of a novel P22 ORFan gene reveals the phage carrier state in *Salmonella*  
557 *typhimurium*. *PLoS Genet* **9**:e1003269. doi:10.1371/journal.pgen.1003269
- 558 Ceysens P-J, Lavigne R. 2010. Bacteriophages of *Pseudomonas*. *Future Microbiol* **5**:1041–1055.  
559 doi:10.2217/fmb.10.66
- 560 Choi K-H, Gaynor JB, White KG, Lopez C, Bosio CM, Karkhoff-Schweizer RR, Schweizer HP. 2005. A  
561 Tn7-based broad-range bacterial cloning and expression system. *Nat Methods* **2**:443–448.  
562 doi:10.1038/nmeth765
- 563 Choi K-H, Kumar A, Schweizer HP. 2006. A 10-min method for preparation of highly electrocompetent  
564 *Pseudomonas aeruginosa* cells: application for DNA fragment transfer between chromosomes  
565 and plasmid transformation. *J Microbiol Methods* **64**:391–397.  
566 doi:10.1016/j.mimet.2005.06.001
- 567 D'Argenio DA, Calfee MW, Rainey PB, Pesci EC. 2002. Autolysis and autoaggregation in *Pseudomonas*  
568 *aeruginosa* colony morphology mutants. *J Bacteriol* **184**:6481–6489.  
569 doi: 10.1128/JB.184.23.6481-6489.2002
- 570 de Carvalho LPS, Blanchard JS. 2006. Kinetic and chemical mechanism of alpha-isopropylmalate

- 571 synthase from *Mycobacterium tuberculosis*. *Biochemistry* **45**:8988–8999.
- 572 doi:10.1021/bi0606602
- 573 De Smet J, Hendrix H, Blasdel BG, Danis-Wlodarczyk K, Lavigne R. 2017. *Pseudomonas* predators:  
574 understanding and exploiting phage-host interactions. *Nat Rev Microbiol* **15**:517–530.  
575 doi:10.1038/nrmicro.2017.61
- 576 De Smet J, Zimmermann M, Kogadeeva M, Ceysens P-J, Vermaelen W, Blasdel B, Bin Jang H, Sauer  
577 U, Lavigne R. 2016. High coverage metabolomics analysis reveals phage-specific alterations to  
578 *Pseudomonas aeruginosa* physiology during infection. *ISME J* **10**:1823–1835.  
579 doi:10.1038/ismej.2016.3
- 580 Du Q, Wang H, Xie J. 2011. Thiamin (vitamin B1) biosynthesis and regulation: a rich source of  
581 antimicrobial drug targets? *Int J Biol Sci* **7**:41–52. doi: 10.7150/ijbs.7.41
- 582 Dubern J-F, Diggle SP. 2008. Quorum sensing by 2-alkyl-4-quinolones in *Pseudomonas aeruginosa*  
583 and other bacterial species. *Mol Biosyst* **4**:882–888. doi:10.1039/b803796p
- 584 Enav H, Mandel-Gutfreund Y, Beja O. 2014. Comparative metagenomic analyses reveal viral-induced  
585 shifts of host metabolism towards nucleotide biosynthesis. *Microbiome* **2**:9. doi:10.1186/2049-  
586 2618-2-9
- 587 Enos-Berlage JL, Downs DM. 1997. Mutations in *sdh* (succinate dehydrogenase genes) alter the  
588 thiamine requirement of *Salmonella typhimurium*. *J Bacteriol* **179**:3989–3996.  
589 doi: 10.1128/jb.179.12.3989-3996
- 590 Fetzner S. 2015. Quorum quenching enzymes. *J Biotechnol* **201**:2–14.  
591 doi:10.1016/j.jbiotec.2014.09.001
- 592 Frodyma M, Rubio A, Downs DM. 2000. Reduced flux through the purine biosynthetic pathway  
593 results in an increased requirement for coenzyme A in thiamine synthesis in *Salmonella enterica*  
594 serovar typhimurium. *J Bacteriol* **182**:236–240. doi: 10.1128/JB.182.1.236-240.2000
- 595 Gambello MJ, Iglewski BH. 1991. Cloning and characterization of the *Pseudomonas aeruginosa* *lasR*  
596 gene, a transcriptional activator of elastase expression. *J Bacteriol* **173**:3000–3009.

- 597 Gruber JD, Chen W, Parnham S, Beauchesne K, Moeller P, Flume PA, Zhang Y-M. 2016. The role of  
598 2,4-dihydroxyquinoline (DHQ) in *Pseudomonas aeruginosa* pathogenicity. *PeerJ* **4**:e1495.  
599 doi:10.7717/peerj.1495
- 600 Gulick AM. 2017. Nonribosomal peptide synthetase biosynthetic clusters of ESKAPE pathogens. *Nat*  
601 *Prod Rep* **34**:981–1009. doi:10.1039/c7np00029d
- 602 Hargreaves KR, Kropinski AM, Clokie MRJ. 2014. What does the talking?: quorum sensing signalling  
603 genes discovered in a bacteriophage genome. *PLoS One* **9**:e85131.  
604 doi:10.1371/journal.pone.0085131
- 605 Hauser R, Blasche S, Dokland T, Haggard-Ljungquist E, von Brunn A, Salas M, Casjens S, Molineux I,  
606 Uetz P. 2012. Bacteriophage protein-protein interactions. *Adv Virus Res* **83**:219–298.  
607 doi:10.1016/B978-0-12-394438-2.00006-2
- 608 Haussler S, Becker T. 2008. The pseudomonas quinolone signal (PQS) balances life and death in  
609 *Pseudomonas aeruginosa* populations. *PLoS Pathog* **4**:e1000166.  
610 doi:10.1371/journal.ppat.1000166
- 611 Hazra A, Chatterjee A, Chatterjee D, Hilmey DG, Sanders JM, Hanes JW, Krishnamoorthy K, McCulloch  
612 KM, Waitner MJ, O’Leary S, Begley TP, Snider MJ. 2009. Coenzyme and Prosthetic Group  
613 Biosynthesis In: Schaechter M, editor. *Encyclopedia of Microbiology* (Third Edition). Oxford:  
614 Academic Press. pp. 79–88. doi:<https://doi.org/10.1016/B978-012373944-5.00069-9>
- 615 Heeb S, Blumer C, Haas D. 2002. Regulatory RNA as mediator in GacA/RsmA-dependent global  
616 control of exoproduct formation in *Pseudomonas fluorescens* CHA0. *J Bacteriol* **184**:1046–1056.  
617 doi: 10.1128/jb.184.4.1046-1056.2002
- 618 Hendrix H, Staes I, Aertsen A, Wagemans J. 2019. Screening for Growth-Inhibitory ORFans in  
619 *Pseudomonas aeruginosa*-Infecting Bacteriophages. *Methods Mol Biol* **1898**:147–162.  
620 doi:10.1007/978-1-4939-8940-9\_12
- 621 Hoyland-Kroghsbo NM, Maerkedahl RB, Svenningsen S Lo. 2013. A quorum-sensing-induced  
622 bacteriophage defense mechanism. *MBio* **4**:e00362-12. doi:10.1128/mBio.00362-12

- 623 Hoyland-Krogsho NM, Paczkowski J, Mukherjee S, Broniewski J, Westra E, Bondy-Denomy J, Bassler  
624 BL. 2017. Quorum sensing controls the *Pseudomonas aeruginosa* CRISPR-Cas adaptive immune  
625 system. *Proc Natl Acad Sci U S A* **114**:131–135. doi:10.1073/pnas.1617415113
- 626 Hurwitz BL, Hallam SJ, Sullivan MB. 2013. Metabolic reprogramming by viruses in the sunlit and dark  
627 ocean. *Genome Biol* **14**:R123. doi:10.1186/gb-2013-14-11-r123
- 628 Jacobs MA, Alwood A, Thaipisuttikul I, Spencer D, Haugen E, Ernst S, Will O, Kaul R, Raymond C, Levy  
629 R, Chun-Rong L, Guenther D, Bovee D, Olson M V, Manoil C. 2003. Comprehensive transposon  
630 mutant library of *Pseudomonas aeruginosa*. *Proc Natl Acad Sci U S A* **100**:14339–14344.  
631 doi:10.1073/pnas.2036282100
- 632 Jenul C, Sieber S, Daeppen C, Mathew A, Lardi M, Pessi G, Hoepfner D, Neuburger M, Linden A,  
633 Gademann K, Eberl L. 2018. Biosynthesis of fragin is controlled by a novel quorum sensing  
634 signal. *Nat Commun* **9**:1297. doi:10.1038/s41467-018-03690-2
- 635 Kanehisa M, Goto S. 2000. KEGG: kyoto encyclopedia of genes and genomes. *Nucleic Acids Res*  
636 **28**:27–30. doi: 10.1093/nar/28.1.27
- 637 Lavigne R, Lecoutere E, Wagemans J, Cenens W, Aertsen A, Schoofs L, Landuyt B, Paeshuyse J, Scheer  
638 M, Schobert M, Ceysens P-J. 2013. A multifaceted study of *Pseudomonas aeruginosa* shutdown  
639 by virulent podovirus LUZ19. *MBio* **4**:e00061-13. doi:10.1128/mBio.00061-13
- 640 Leblanc C, Caumont-Sarcos A, Comeau AM, Krisch HM. 2009. Isolation and genomic characterization  
641 of the first phage infecting *Iodobacteria*: varphiPLPE, a myovirus having a novel set of features.  
642 *Environ Microbiol Rep* **1**:499–509. doi:10.1111/j.1758-2229.2009.00055.x
- 643 Lee J, Wu J, Deng Y, Wang J, Wang C, Wang J, Chang C, Dong Y, Williams P, Zhang L-H. 2013. A cell-cell  
644 communication signal integrates quorum sensing and stress response. *Nat Chem Biol* **9**:339–  
645 343. doi:10.1038/nchembio.1225
- 646 Lin J, Cheng J, Wang Y, Shen X. 2018. The *Pseudomonas* Quinolone Signal (PQS): Not Just for Quorum  
647 Sensing Anymore. *Front Cell Infect Microbiol* **8**:230. doi:10.3389/fcimb.2018.00230
- 648 Maxwell KL. 2019. Phages Tune in to Host Cell Quorum Sensing. *Cell* **176**:7–8.

- 649           doi:<https://doi.org/10.1016/j.cell.2018.12.007>
- 650   McDaniel LD, Young E, Delaney J, Ruhnau F, Ritchie KB, Paul JH. 2010. High frequency of horizontal  
651           gene transfer in the oceans. *Science* **330**:50. doi:10.1126/science.1192243
- 652   Miller ES, Kutter E, Mosig G, Arisaka F, Kunisawa T, Ruger W. 2003. Bacteriophage T4 genome.  
653           *Microbiol Mol Biol Rev* **67**:86–156. doi: 10.1128/MMBR.67.1.86-156.2003
- 654   Mitchell CA, Shi C, Aldrich CC, Gulick AM. 2012. Structure of PA1221, a nonribosomal peptide  
655           synthetase containing adenylation and peptidyl carrier protein domains. *Biochemistry* **51**:3252–  
656           3263. doi:10.1021/bi300112e
- 657   Muller C, Birmes FS, Niewerth H, Fetzner S. 2014. Conversion of the *Pseudomonas aeruginosa*  
658           Quinolone Signal and Related Alkylhydroxyquinolines by *Rhodococcus* sp. Strain BG43. *Appl*  
659           *Environ Microbiol* **80**:7266–7274. doi:10.1128/AEM.02342-14
- 660   O’Toole N, Cygler M. 2003. The Final Player in the Coenzyme A Biosynthetic Pathway. *Structure*  
661           **11**:899–900. doi:[https://doi.org/10.1016/S0969-2126\(03\)00161-8](https://doi.org/10.1016/S0969-2126(03)00161-8)
- 662   Patterson AG, Jackson SA, Taylor C, Evans GB, Salmond GPC, Przybilski R, Staals RHJ, Fineran PC.  
663           2016. Quorum Sensing Controls Adaptive Immunity through the Regulation of Multiple CRISPR-  
664           Cas Systems. *Mol Cell* **64**:1102–1108. doi:10.1016/j.molcel.2016.11.012
- 665   Pei R, Lamas-Samanamud GR. 2014. Inhibition of biofilm formation by T7 bacteriophages producing  
666           quorum-quenching enzymes. *Appl Environ Microbiol* **80**:5340–5348. doi:10.1128/AEM.01434-14
- 667   Pesci EC, Pearson JP, Seed PC, Iglewski BH. 1997. Regulation of las and rhl quorum sensing in  
668           *Pseudomonas aeruginosa*. *J Bacteriol* **179**:3127–3132. doi: 10.1128/jb.179.10.3127-3132.1997
- 669   Qin X, Sun Q, Yang B, Pan X, He Y, Yang H. 2017. Quorum sensing influences phage infection  
670           efficiency via affecting cell population and physiological state. *J Basic Microbiol* **57**:162–170.  
671           doi:10.1002/jobm.201600510
- 672   Qiu D, Damron FH, Mima T, Schweizer HP, Yu HD. 2008. PBAD-based shuttle vectors for functional  
673           analysis of toxic and highly regulated genes in *Pseudomonas* and *Burkholderia* spp. and other  
674           bacteria. *Appl Environ Microbiol* **74**:7422–7426. doi:10.1128/AEM.01369-08

- 675 Roucourt B, Lavigne R. 2009. The role of interactions between phage and bacterial proteins within  
676 the infected cell: a diverse and puzzling interactome. *Environ Microbiol* **11**:2789–2805.  
677 doi:10.1111/j.1462-2920.2009.02029.x
- 678 Roucourt B, Minnebo N, Augustijns P, Hertveldt K, Volckaert G, Lavigne R. 2009. Biochemical  
679 characterization of malate synthase G of *P. aeruginosa*. *BMC Biochem* **10**:20. doi:10.1186/1471-  
680 2091-10-20
- 681 Rouhiainen L, Jokela J, Fewer DP, Urmann M, Sivonen K. 2010. Two alternative starter modules for  
682 the non-ribosomal biosynthesis of specific anabaenopeptin variants in *Anabaena*  
683 (*Cyanobacteria*). *Chem Biol* **17**:265–273. doi:10.1016/j.chembiol.2010.01.017
- 684 Samson JE, Magadan AH, Sabri M, Moineau S. 2013. Revenge of the phages: defeating bacterial  
685 defences. *Nat Rev Microbiol* **11**:675–687. doi:10.1038/nrmicro3096
- 686 Schuster M, Greenberg EP. 2006. A network of networks: quorum-sensing gene regulation in  
687 *Pseudomonas aeruginosa*. *Int J Med Microbiol* **296**:73–81. doi:10.1016/j.ijmm.2006.01.036
- 688 Schuster M, Lostroh CP, Ogi T, Greenberg EP. 2003. Identification, timing, and signal specificity of  
689 *Pseudomonas aeruginosa* quorum-controlled genes: a transcriptome analysis. *J Bacteriol*  
690 **185**:2066–2079. doi: 10.1128/JB.185.7.2066-2079.2003
- 691 Sharon I, Battchikova N, Aro E-M, Giglione C, Meinel T, Glaser F, Pinter RY, Breitbart M, Rohwer F,  
692 Beja O. 2011. Comparative metagenomics of microbial traits within oceanic viral communities.  
693 *ISME J* **5**:1178–1190. doi:10.1038/ismej.2011.2
- 694 Silpe JE, Bassler BL. 2019. A Host-Produced Quorum-Sensing Autoinducer Controls a Phage Lysis-  
695 Lysogeny Decision. *Cell* **176**:268–280.e13. doi:10.1016/j.cell.2018.10.059
- 696 Spalding MD, Prigge ST. 2010. Lipoic acid metabolism in microbial pathogens. *Microbiol Mol Biol Rev*  
697 **74**:200–228. doi:10.1128/MMBR.00008-10
- 698 Storz MP, Maurer CK, Zimmer C, Wagner N, Brengel C, de Jong JC, Lucas S, Musken M, Haussler S,  
699 Steinbach A, Hartmann RW. 2012. Validation of PqsD as an anti-biofilm target in *Pseudomonas*  
700 *aeruginosa* by development of small-molecule inhibitors. *J Am Chem Soc* **134**:16143–16146.

- 701           doi:10.1021/ja3072397
- 702   Sullivan MB, Lindell D, Lee JA, Thompson LR, Bielawski JP, Chisholm SW. 2006. Prevalence and  
703           evolution of core photosystem II genes in marine cyanobacterial viruses and their hosts. *PLoS*  
704           *Biol* **4**:e234. doi:10.1371/journal.pbio.0040234
- 705   Suttle CA. 2007. Marine viruses--major players in the global ecosystem. *Nat Rev Microbiol* **5**:801–812.  
706           doi:10.1038/nrmicro1750
- 707   Thompson LR, Zeng Q, Kelly L, Huang KH, Singer AU, Stubbe J, Chisholm SW. 2011. Phage auxiliary  
708           metabolic genes and the redirection of cyanobacterial host carbon metabolism. *Proc Natl Acad*  
709           *Sci U S A* **108**:E757-64. doi:10.1073/pnas.1102164108
- 710   Van den Bossche A, Ceysens P-J, De Smet J, Hendrix H, Bellon H, Leimer N, Wagemans J, Delattre A-  
711           S, Cenens W, Aertsen A, Landuyt B, Minakhin L, Severinov K, Noben J-P, Lavigne R. 2014.  
712           Systematic identification of hypothetical bacteriophage proteins targeting key protein  
713           complexes of *Pseudomonas aeruginosa*. *J Proteome Res* **13**:4446–4456. doi:10.1021/pr500796n
- 714   Van den Bossche A, Hardwick SW, Ceysens P-J, Hendrix H, Voet M, Dendooven T, Bandyra KJ, De  
715           Maeyer M, Aertsen A, Noben J-P, Luisi BF, Lavigne R. 2016. Structural elucidation of a novel  
716           mechanism for the bacteriophage-based inhibition of the RNA degradosome. *Elife* **5**.  
717           doi:10.7554/eLife.16413
- 718   Van Houdt R, Aertsen A, Jansen A, Quintana AL, Michiels CW. 2004. Biofilm formation and cell-to-cell  
719           signalling in Gram-negative bacteria isolated from a food processing environment. *J Appl*  
720           *Microbiol* **96**:177–184. doi:10.1046/j.1365-2672.2003.02131.x
- 721   Wagemans J, Blasdel BG, Van den Bossche A, Uytterhoeven B, De Smet J, Paeshuyse J, Cenens W,  
722           Aertsen A, Uetz P, Delattre A-S, Ceysens P-J, Lavigne R. 2014. Functional elucidation of  
723           antibacterial phage ORFans targeting *Pseudomonas aeruginosa*. *Cell Microbiol* **16**:1822–1835.  
724           doi:10.1111/cmi.12330
- 725   Wagemans J, Delattre A-S, Uytterhoeven B, De Smet J, Cenens W, Aertsen A, Ceysens P-J, Lavigne R.  
726           2015. Antibacterial phage ORFans of *Pseudomonas aeruginosa* phage LUZ24 reveal a novel



- 727 MvaT inhibiting protein. *Front Microbiol* **6**:1242. doi:10.3389/fmicb.2015.01242
- 728 Weidel E, de Jong JC, Brengel C, Storz MP, Braunshausen A, Negri M, Plaza A, Steinbach A, Muller R,  
729 Hartmann RW. 2013. Structure optimization of 2-benzamidobenzoic acids as PqsD inhibitors for  
730 *Pseudomonas aeruginosa* infections and elucidation of binding mode by SPR, STD NMR, and  
731 molecular docking. *J Med Chem* **56**:6146–6155. doi:10.1021/jm4006302
- 732 Williams P, Camara M. 2009. Quorum sensing and environmental adaptation in *Pseudomonas*  
733 *aeruginosa*: a tale of regulatory networks and multifunctional signal molecules. *Curr Opin*  
734 *Microbiol* **12**:182–191. doi:10.1016/j.mib.2009.01.005
- 735 Winsor GL, Griffiths EJ, Lo R, Dhillon BK, Shay JA, Brinkman FSL. 2016. Enhanced annotations and  
736 features for comparing thousands of *Pseudomonas* genomes in the *Pseudomonas* genome  
737 database. *Nucleic Acids Res* **44**:D646-53. doi:10.1093/nar/gkv1227
- 738 Zhang M, Su S, Bhatnagar RK, Hassett DJ, Lu LJ. 2012. Prediction and analysis of the protein  
739 interactome in *Pseudomonas aeruginosa* to enable network-based drug target selection. *PLoS*  
740 *One* **7**:e41202. doi:10.1371/journal.pone.0041202
- 741 Zhang X, Bremer H. 1995. Control of the *Escherichia coli* *rrnB* P1 promoter strength by ppGpp. *J Biol*  
742 *Chem* **270**:11181–11189. doi: 10.1074/jbc.270.19.11181
- 743 Zhang Y-M, Frank MW, Zhu K, Mayasundari A, Rock CO. 2008. PqsD is responsible for the synthesis of  
744 2,4-dihydroxyquinoline, an extracellular metabolite produced by *Pseudomonas aeruginosa*. *J*  
745 *Biol Chem* **283**:28788–28794. doi:10.1074/jbc.M804555200
- 746 Zhao X, Chen C, Shen W, Huang G, Le S, Lu S, Li M, Zhao Y, Wang J, Rao X, Li G, Shen M, Guo K, Yang Y,  
747 Tan Y, Hu F. 2016. Global Transcriptomic Analysis of Interactions between *Pseudomonas*  
748 *aeruginosa* and Bacteriophage PaP3. *Sci Rep* **6**:19237. doi:10.1038/srep19237
- 749 Zhao X, Shen M, Jiang X, Shen W, Zhong Q, Yang Y, Tan Y, Agnello M, He X, Hu F, Le S. 2017.  
750 Transcriptomic and Metabolomics Profiling of Phage-Host Interactions between Phage PaP1  
751 and *Pseudomonas aeruginosa*. *Front Microbiol* **8**:548. doi:10.3389/fmicb.2017.00548
- 752 Zhou Z, Ma S. 2017. Recent Advances in the Discovery of PqsD Inhibitors as Antimicrobial Agents.

753 *ChemMedChem* **12**:420–425. doi:10.1002/cmdc.201700015

## Figure supplements

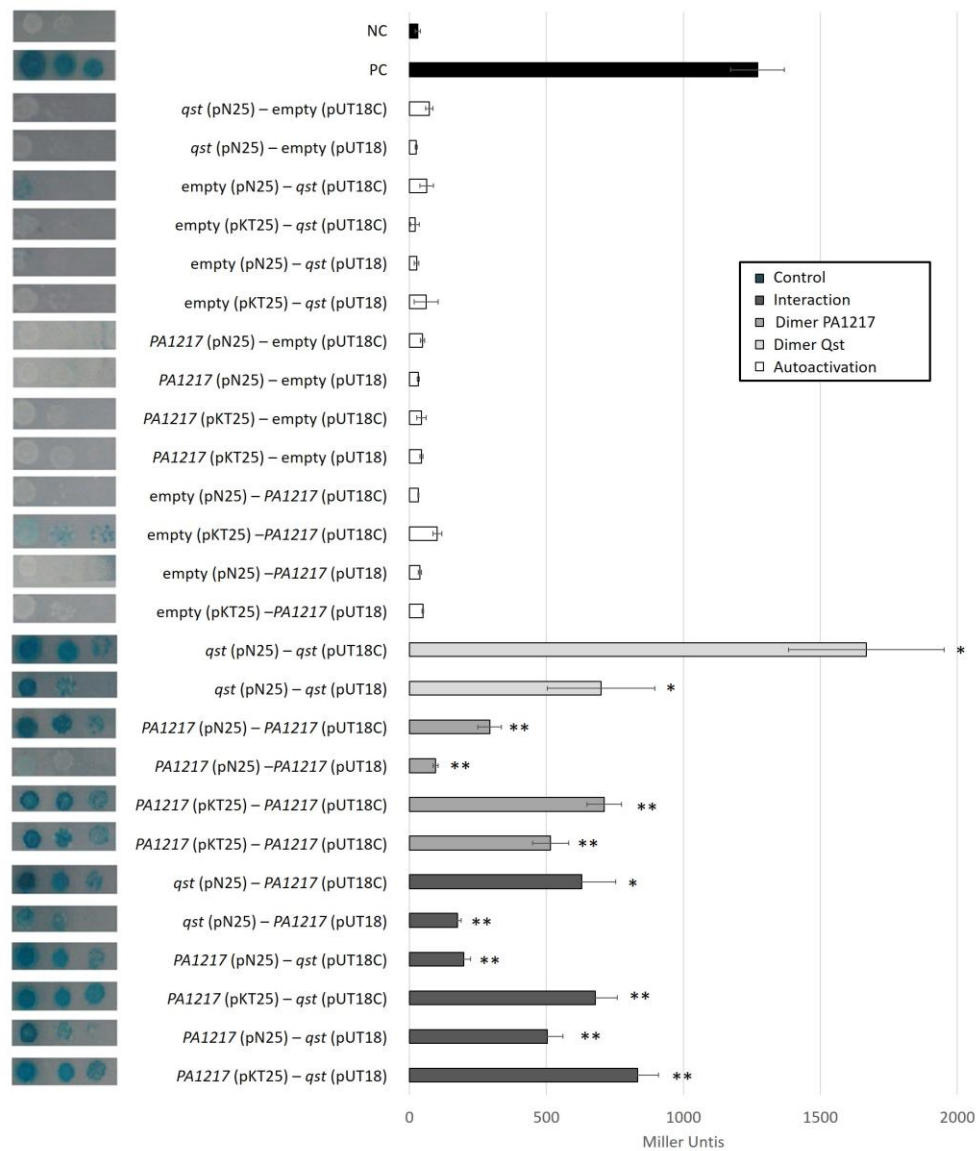

754

755 **Figure 2-figure supplement 1. Bacterial two-hybrid results of Qst and PA1217.** Interactions were visualized by  
 756 a drop test on minimal medium, and quantified by measuring the  $\beta$ -galactosidase activity, which are indicated in  
 757 Miller Units. Non-fused T25 and T18 domains were used as a negative control, and the leucine zipper of GCN4  
 758 was used as a positive control. Error bars represent standard deviation and  $P$ -values (compared to both controls)  
 759 were calculated using the Student's t-test ( $n=3$ ), \* $p<0.05$ , \*\* $p<0.01$ .

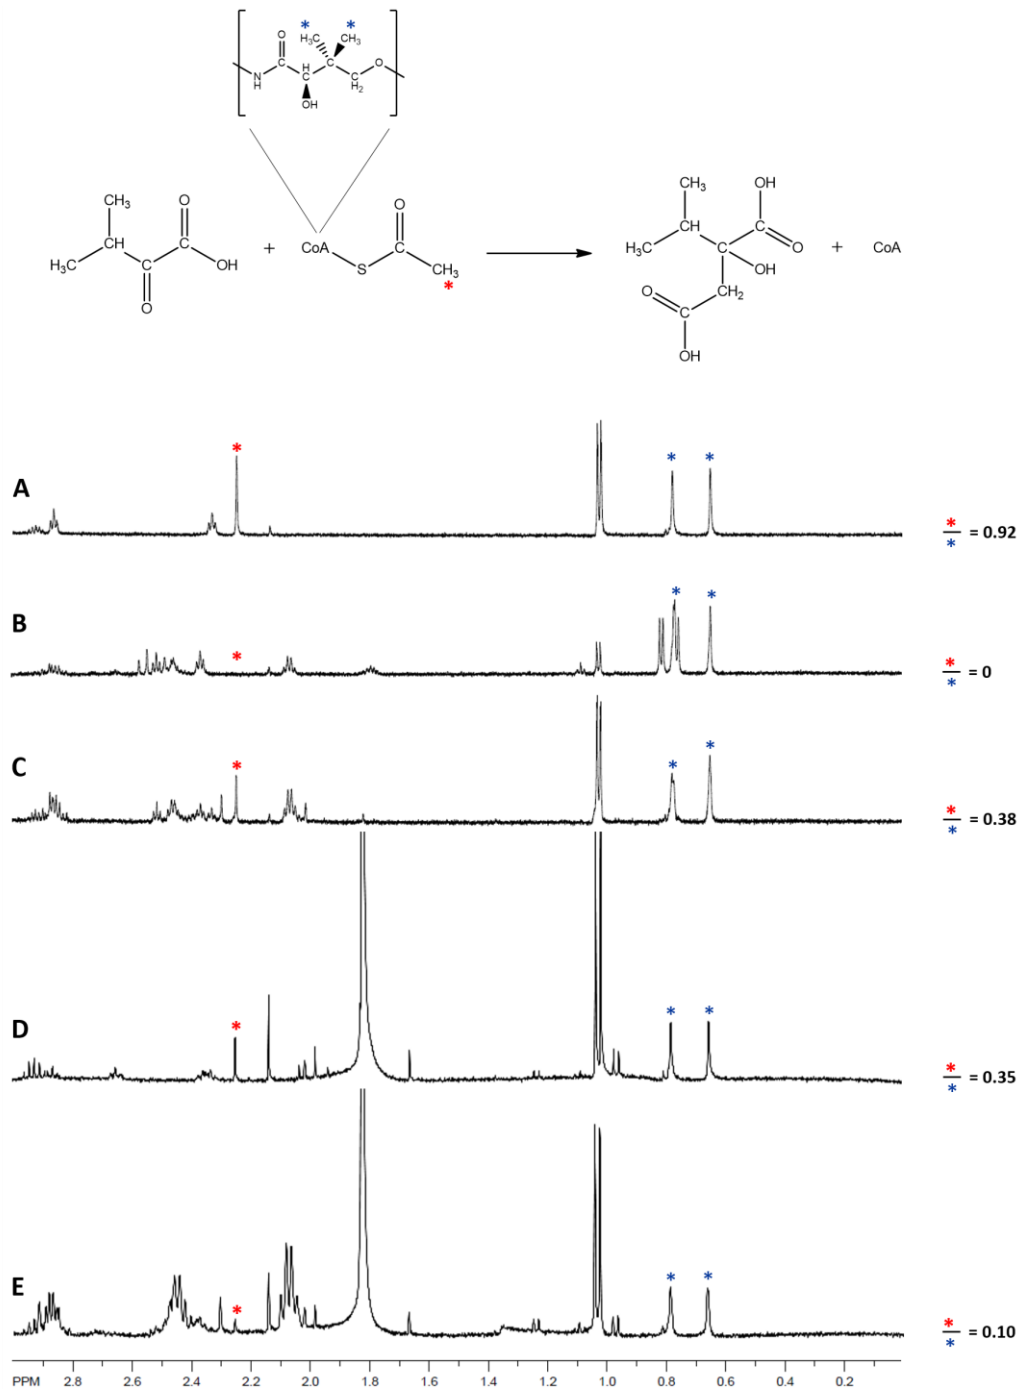

760

761 **Figure 3-figure supplement 1. <sup>1</sup>H-NMR analysis of acetyltransferase and 2-isopropylmalate synthase activity.**

762 Region of spectral interest of the reaction of the 2-isopropylmalate synthase LeuA (B), the hypothetical protein

763 PA1217 (C), Qst (D) and both PA1217 and Qst (E) with 3-methyl-2-oxobutanoate and acetyl-CoA. The top

764 spectrum (A) shows the reaction mixture without enzyme. The ratio of peak 4 compared to peak 5 shows the

765 percentage of intact acetyl-CoA molecules in the reaction mixture. The lower the amount, the more acetyl-CoA

766 molecules were used by the protein.

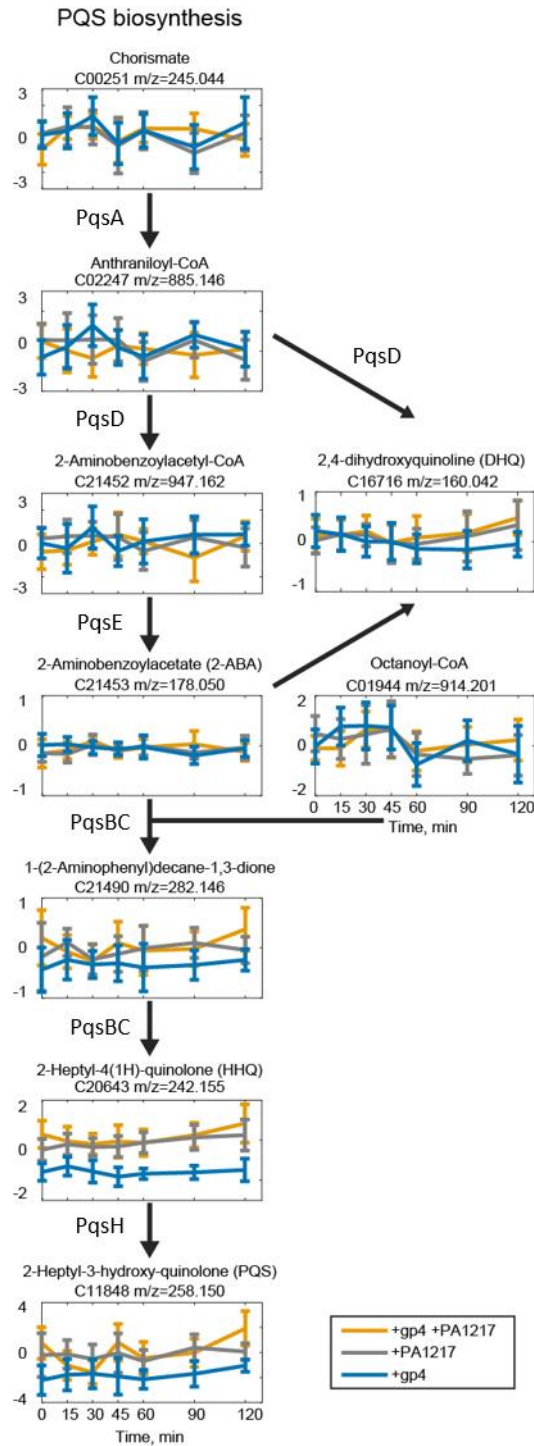

767

768 **Figure 4-figure supplement 1. Metabolomic results of the *P. aeruginosa* quinolone signal (PQS) pathway after**

769 **Qst and PA1217 expression.** Graphs show the fold changes of metabolites in the PQS pathway compared to IPTG-

770 induced wild-type *P. aeruginosa* PAO1 at different stages of expression (0, 15, 30, 45, 60, 90 and 120 min). The x

771 axis shows the time points during infection (in minutes), and the y axis shows the fold changes compared to the

772 control. Annotated metabolite name and ion mass are shown above the graph. Error bars represent fold change

773 standard deviations (n=3).

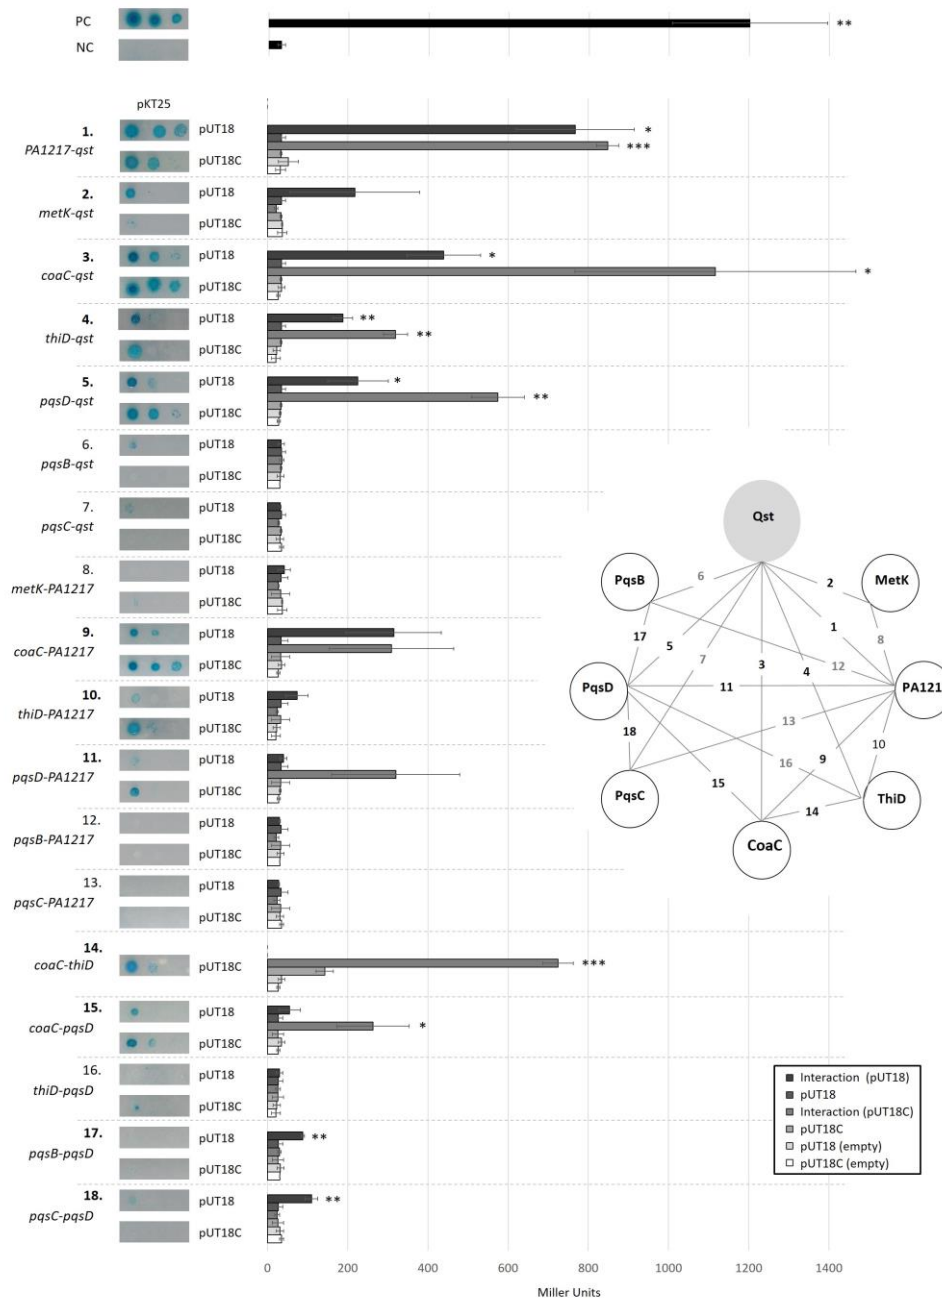

774

775 **Figure 5-figure supplement 1. Bacterial two-hybrid results of Qst with PA1217, MetK, CoaC, ThiD, PqsB, PqsC**

776 **and PqsD.** The diagram shows the tested combinations, in which the numbers (black: interaction; grey: no

777 interaction) correspond with the numbers in the graph. The T25 domain is N-terminally fused to the first listed

778 protein, the T18 domain is C- (pUT18) or N-terminally (pUT18C) fused to the second protein. Interactions were

779 visualized by a drop test on minimal medium, and quantified by measuring the  $\beta$ -galactosidase activity, which

780 are indicated in Miller Units. Non-fused T25 and T18 domains were used as a negative control, and the leucine

781 zipper of GCN4 was used as a positive control. Error bars represent standard deviation and *P*-values (compared

782 to both controls) were calculated using the Student's t-test (n=3), \**p*<0.5, \*\**p*<0.01, \*\*\* *p*<0.001.

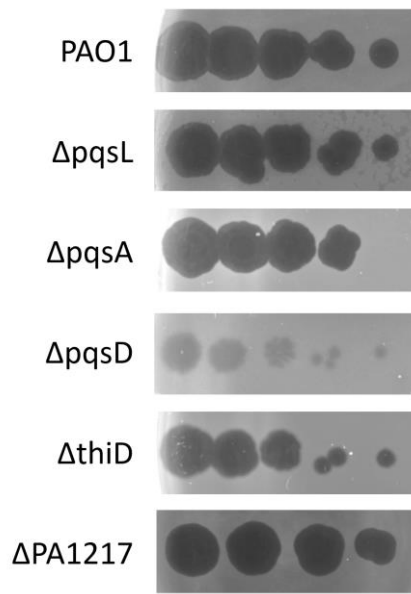

783

784 **Figure 6-figure supplement 1. Serial dilutions of phage LUZ19 on wild-type *P. aeruginosa* PAO1 (top) and**  
785 **transposon mutants. One microliter of, from left to right  $10^7$ ,  $10^6$ ,  $10^5$ ,  $10^4$  and  $10^3$  pfu/ml, dilution was spotted**  
786 **on lawns of (mutant) *P. aeruginosa* strains.**

## Source Data

787 **Figure 2-Source Data 1. Interaction analyses between Qst and PA1217**

788 **Figure 2-figure supplement 1-Source data 1. Bacterial two-hybrid results of Qst and PA1217**

789 **Figure 3-Source Data 1. CoA acetyltransferase activity assay**

790 **Figure 4-Source Data 1. Metabolites influenced in *P. aeruginosa* expressing Qst.**

791 Levels of metabolites in wild-type *P. aeruginosa* PAO1 strain (control), *P. aeruginosa* PAO1 strains expressing Qst  
792 (gp4), overexpressing PA1217 (PA1217), and in a strain both expressing Qst and PA1217 (double) are given. For  
793 each condition and control, the normalized ion intensities, ion fold changes, fold change standard deviations, p-  
794 values calculated with unpaired t-test for each time point, and Page's trend test p-values for the time-course  
795 data are showed.

796 **Figure 4-Source Data 2. PQS bioassay**

797 **Figure 5-Source Data 1. *In vitro* pull down of *P. aeruginosa* cell lysate, using His-tagged Qst as a bait.**

798 MS results of the *in vitro* pull-down with His-tagged Qst as bait and *P. aeruginosa* cell lysate as prey. The numbers  
799 in the summarized table indicate the 'Total spectral Count' identified for a specific protein. Analyses were done  
800 on a LTQ-Orbitrap Velos Pro (Thermo Scientific).

801 **Figure 5-figure supplement 1-Source Data 1. Bacterial two-hybrid results of Qst, PA1217, MetK, CoaC, ThiD,  
802 PqsB, PqsC and PqsD**

803 **Figure 6-Source Data 1. Metabolomics of phage-infected *P. aeruginosa*.**

804 The high-coverage metabolomics data of the *P. aeruginosa* phage infections are obtained from De Smet *et al.*  
805 (2016). For this, fold changes were calculated in comparison to control samples and normalized to time 0 of  
806 infection.
